# Supplementary material for: Nucleofugality hierarchy, in the aminolysis reaction of 4-cyanophenyl 4-nitrophenyl carbonate and thionocarbonate. Experimental and theoretical study
Source: Royal Society of Chemistry journal article supplement (doi:10.1039/d0nj05837h), 2021-01-01
Supplement: d0nj05837h1.pdf [file d0nj05837h1.pdf]

## Supporting Information

### NUCLEOFUGALITY HIERARCHY, IN THE AMINOLYSIS REACTION OF 4-CYANOPHENYL 4-NITROPHENYL CARBONATE AND THIONOCARBONATE. EXPERIMENTAL AND THEORETICAL STUDY

Rodrigo Montecinos,\* Margarita E. Aliaga, Paulina Pavez, Patricio Cornejo and José G. Santos\*.

Departamento de Química Física, Facultad de Química y de Farmacia, Pontificia Universidad Católica de Chile, Casilla 306, Santiago, Chile.

\* Corresponding Authors, E-mail: [jgsantos@uc.cl](mailto:jgsantos@uc.cl) (J.G. Santos) and [rmontecinoe@uc.cl](mailto:rmontecinoe@uc.cl) (R. Montecinos)

|                  |                                                                                                                                                                                                                                 |     |
|------------------|---------------------------------------------------------------------------------------------------------------------------------------------------------------------------------------------------------------------------------|-----|
| <b>Figure S1</b> | <sup>1</sup> H-NMR spectrum for the reaction of <b>9</b> with excess of morpholine in acetonitrile-d <sub>3</sub>                                                                                                               | S6  |
| <b>Figure S2</b> | <sup>1</sup> H-NMR spectrum for the reaction of <b>7</b> with excess of morpholine in deuterated acetonitrile-d <sub>3</sub>                                                                                                    | S7  |
| <b>Figure S3</b> | Primary kinetic data for the reaction of <b>7</b> with piperidine in toluene solution.                                                                                                                                          | S8  |
| <b>Figure S4</b> | Primary kinetic data for the reaction of <b>7</b> with 1-(2-hydroxyethyl)piperazine in acetonitrile solution.                                                                                                                   | S8  |
| <b>Figure S5</b> | Primary kinetic data for the reaction of <b>9</b> with morpholine in dimethyl sulfoxide solution.                                                                                                                               | S9  |
| <b>Figure S6</b> | Primary kinetic data for the reaction of <b>9</b> with morpholine in acetonitrile solution.                                                                                                                                     | S9  |
| <b>Table S1</b>  | Total amine concentration [N] <sub>T</sub> and pseudo first order rate constants ( <i>k</i> <sub>obs</sub> ) for the reaction of <b>7</b> with Secondary Alicyclic Amines in Acetonitrile solution, at 25 ± 0.1 ° C.            | S10 |
| <b>Table S2</b>  | Total amine concentration [N] <sub>T</sub> and pseudo first order rate constants ( <i>k</i> <sub>obs</sub> ) for the reaction of <b>9</b> with Secondary Alicyclic Amines in Acetonitrile solution, at 25 ± 0.1 ° C.            | S10 |
| <b>Table S3</b>  | Experimental conditions and pseudo first order rate constants for the reactions of <b>7</b> with piperidine at 25°C, in different solvents.                                                                                     | S11 |
| <b>Table S4</b>  | Total piperidine concentration and pseudo first order rate constants ( <i>k</i> <sub>obsd</sub> ) for the reaction of <b>9</b> with piperidine in different solvents, at 25 ± 0.1 ° C.                                          | S12 |
| <b>Figure S7</b> | log <i>k</i> <sub>N</sub> against E <sub>T</sub> (30) for the reactions of <b>7</b> and <b>9</b> with piperidine in different solvents                                                                                          | S13 |
| <b>Table S5</b>  | Statistical data from the stepwise regression procedure including Catalan's parameters for the reaction of <b>7</b> with piperidine.                                                                                            | S14 |
| <b>Table S6</b>  | Statistical data from the stepwise regression procedure including Catalan's parameters for the reaction of <b>9</b> with piperidine                                                                                             | S14 |
| <b>Table S7</b>  | Bond length of the reactive center in reactant, concerted TS (CTS), intermediate (T <sup>±</sup> ) and second transition state for the reaction of compound <b>7</b> with morpholine in acetonitrile. All bond length are in Å. | S15 |
| <b>Table S8</b>  | Bond length of the reactive center in reactant, concerted TS (CTS), intermediate (T <sup>±</sup> ) and second transition state for the reaction of compound <b>7</b> with piperidine in acetonitrile. All bond lengths are in Å | S15 |
| <b>Table S9</b>  | Bond length of the reactive center in reactant, concerted TS (cTS), intermediate (T <sup>±</sup> ) and second transition state for the reaction of compound <b>9</b> with morpholine in acetonitrile. All bond length are in Å  | S16 |
| <b>Table S10</b> | Bond length of the reactive center in reactant, concerted TS (cTS), intermediate (T <sup>±</sup> ) and second transition state for the reaction of compound <b>9</b> with piperidine in acetonitrile. All bond length are in Å  | S16 |
| <b>Table S11</b> | Total and relative energies for the structures along the concerted and stepwise mechanism of the aminolysis reaction of compounds <b>7</b> with morpholine and piperidine, in acetonitrile (PCM).                               | S17 |
| <b>Table S12</b> | Total and relative energies for the structures along the concerted and stepwise mechanism of the aminolysis reaction of compounds <b>9</b> with morpholine and piperidine, in acetonitrile.                                     | S17 |
| <b>Table S13</b> | Cartesian coordinates, energy (u.a.) for the reactants associated to the                                                                                                                                                        | S18 |

|                  |                                                                                                                                                                                                                                                                                             |     |
|------------------|---------------------------------------------------------------------------------------------------------------------------------------------------------------------------------------------------------------------------------------------------------------------------------------------|-----|
|                  | nucleophilic attack of morpholine to compound <b>7</b> in acetonitrile, calculated using M06-2X/6-31G++(d,p) level theory                                                                                                                                                                   |     |
| <b>Table S14</b> | Cartesian coordinates, energy (u.a.) for the reactants associated to the nucleophilic attack of piperidine to compound <b>7</b> in acetonitrile, calculated using M06-2X/6-31G++(d,p) level theory                                                                                          | S19 |
| <b>Table S15</b> | Cartesian coordinates, energy (u.a.) for the reactants associated to the nucleophilic attack of morpholine to compound <b>9</b> in acetonitrile, calculated using M06-2X/6-31G++(d,p) level theory                                                                                          | S20 |
| <b>Table S16</b> | Cartesian coordinates, energy (u.a.) for the reactants associated to the nucleophilic attack of piperidine to compound <b>9</b> in acetonitrile, calculated using M06-2X/6-31G++(d,p) level theory                                                                                          | S21 |
| <b>Table S17</b> | Cartesian coordinates, energy (u.a.) and number of imaginary frequencies (NIMAG) for Transition State (TS1) associated to the nucleophilic attack of morpholine to compound <b>7</b> in acetonitrile, calculated using M06-2X/6-31G++(d,p) level theory                                     | S22 |
| <b>Table S18</b> | Cartesian coordinates, energy (u.a.) and number of imaginary frequencies (NIMAG) for concerted Transition State (CTS) associated to the departure of 4-nitrophenol for the reaction of compound <b>7</b> with morpholine in acetonitrile, calculated using M06-2X/6-31G++(d,p) level theory | S23 |
| <b>Table S19</b> | Cartesian coordinates, energy (u.a.) and number of imaginary frequencies (NIMAG) for concerted Transition State (CTS) associated to the departure of 4-cyanophenol for the reaction of compound <b>7</b> with morpholine in acetonitrile, calculated using M06-2X/6-31G++(d,p) level theory | S24 |
| <b>Table S20</b> | Cartesian coordinates, energy (u.a.) for the intermediate structure (T±) associated to the reaction of compound <b>7</b> with morpholine in acetonitrile, calculated using M06-2X/6-31G++(d,p) level theory                                                                                 | S25 |
| <b>Table S21</b> | Cartesian coordinates, energy (u.a.) and number of imaginary frequencies (NIMAG) for Transition State (TS2) associated to the departure of 4-nitrophenol from the reaction of compound <b>7</b> with morpholine, calculated using M06-2X/6-31G++(d,p) level theory                          | S26 |
| <b>Table S22</b> | Cartesian coordinates, energy (u.a.) and number of imaginary frequencies (NIMAG) for Transition State (TS2) associated to the departure of 4-cyanophenol from the reaction of compound <b>7</b> with morpholine, calculated using M06-2X/6-31G++(d,p) level theory                          | S27 |
| <b>Table S23</b> | Cartesian coordinates, energy (u.a.) and number of imaginary frequencies (NIMAG) for Transition State (TS1) associated to the nucleophilic attack of piperidine to compound <b>7</b> in acetonitrile, calculated using M06-2X/6-31G++(d,p) level theory                                     | S28 |
| <b>Table S24</b> | Cartesian coordinates, energy (u.a.) and number of imaginary frequencies (NIMAG) for concerted Transition State (CTS) associated to the departure of 4-nitrophenol for the reaction of compound <b>7</b> with piperidine, calculated using M06-2X/6-31G++(d,p) level theory                 | S29 |
| <b>Table S25</b> | Cartesian coordinates, energy (u.a.) and number of imaginary frequencies (NIMAG) for concerted Transition State (CTS) associated to the departure of 4-cyanophenol for the reaction of compound <b>7</b> with piperidine, calculated using M06-2X/6-                                        | S30 |

|                   |                                                                                                                                                                                                                                                                                             |     |
|-------------------|---------------------------------------------------------------------------------------------------------------------------------------------------------------------------------------------------------------------------------------------------------------------------------------------|-----|
|                   | 31G++(d,p) level theory                                                                                                                                                                                                                                                                     |     |
| <b>Table S26</b>  | Cartesian coordinates, energy (u.a.) for the intermediate structure (T±) associated to the reaction of compound <b>7</b> with piperidine in acetonitrile, calculated using M06-2X/6-31G++(d,p) level theory                                                                                 | S31 |
| <b>Table S27</b>  | Cartesian coordinates, energy (u.a.) and number of imaginary frequencies (NIMAG) for Transition State (TS2) associated to the departure of 4-nitrophenol from the reaction of compound <b>7</b> with piperidine in acetonitrile, calculated using M06-2X/6-31G++(d,p) level theory          | S32 |
| <b>Table S28</b>  | Cartesian coordinates, energy (u.a.) and number of imaginary frequencies (NIMAG) for concerted Transition State (TS2) associated to the departure of 4-cyanophenol for the reaction of compound <b>7</b> with piperidine in acetonitrile, calculated using M06-2X/6-31G++(d,p) level theory | S33 |
| <b>Table S29</b>  | Cartesian coordinates, energy (u.a.) and number of imaginary frequencies (NIMAG) for Transition State (TS1) associated to the nucleophilic attack of morpholine to compound <b>9</b> in acetonitrile, calculated using M06-2X/6-31G++(d,p) level theory                                     | S34 |
| <b>Table S30</b>  | Cartesian coordinates, energy (u.a.) and number of imaginary frequencies (NIMAG) for concerted Transition State (CTS) associated to the departure of 4-nitrophenol for the reaction of compound <b>9</b> with morpholine in acetonitrile, calculated using M06-2X/6-31G++(d,p) level theory | S35 |
| <b>Table S31</b>  | Cartesian coordinates, energy (u.a.) and number of imaginary frequencies (NIMAG) for concerted Transition State (CTS) associated to the departure of 4-cyanophenol for the reaction of compound <b>9</b> with morpholine in acetonitrile, calculated using M06-2X/6-31G++(d,p) level theory | S36 |
| <b>Table S32.</b> | Cartesian coordinates, energy (u.a.) for the intermediate structure (T±) associated to the reaction of compound <b>9</b> with morpholine in acetonitrile, calculated using M06-2X/6-31G++(d,p) level theory                                                                                 | S37 |
| <b>Table S33.</b> | Cartesian coordinates, energy (u.a.) and number of imaginary frequencies (NIMAG) for concerted Transition State (TS2) associated to the departure of 4-nitrophenol for the reaction of compound <b>9</b> with morpholine, calculated using M06-2X/6-31G++(d,p) level theory                 | S38 |
| <b>Table S34.</b> | Cartesian coordinates, energy (u.a.) and number of imaginary frequencies (NIMAG) for concerted Transition State (TS2) associated to the departure of 4-cyanophenol for the reaction of compound <b>9</b> with morpholine, calculated using M06-2X/6-31G++(d,p) level theory                 | S39 |
| <b>Table S35.</b> | Cartesian coordinates, energy (u.a.) and number of imaginary frequencies (NIMAG) for Transition State (TS1) associated to the nucleophilic attack of piperidine to compound <b>9</b> , calculated using M06-2X/6-31G++(d,p) level theory                                                    | S40 |
| <b>Table S36.</b> | Cartesian coordinates, energy (u.a.) and number of imaginary frequencies (NIMAG) for concerted Transition State (CTS) associated to the departure of 4-nitrophenol for the reaction of compound <b>9</b> with piperidine, calculated using M06-2X/6-31G++(d,p) level theory                 | S41 |

|                    |                                                                                                                                                                                                                                                                                             |     |
|--------------------|---------------------------------------------------------------------------------------------------------------------------------------------------------------------------------------------------------------------------------------------------------------------------------------------|-----|
| <b>Table S37.</b>  | Cartesian coordinates, energy (u.a.) and number of imaginary frequencies (NIMAG) for concerted Transition State (CTS) associated to the departure of 4-cyanophenol for the reaction of compound <b>9</b> with piperidine, calculated using M06-2X/6-31G++(d,p) level theory                 | S42 |
| <b>Table S38</b>   | Cartesian coordinates, energy (u.a.) for the intermediate structure (T±) associated to the reaction of compound <b>9</b> with piperidine in acetonitrile, calculated using M06-2X/6-31G++(d,p) level theory                                                                                 | S43 |
| <b>Table S39.</b>  | Cartesian coordinates, energy (u.a.) and number of imaginary frequencies (NIMAG) for concerted Transition State (TS2) associated to the departure of 4-nitrophenol for the reaction of compound <b>9</b> with piperidine in acetonitrile, calculated using M06-2X/6-31G++(d,p) level theory | S44 |
| <b>Table S40</b>   | Cartesian coordinates, energy (u.a.) and number of imaginary frequencies (NIMAG) for concerted Transition State (TS2) associated to the departure of 4-cyanophenol for the reaction of compound <b>9</b> with piperidine in acetonitrile, calculated using M06-2X/6-31G++(d,p) level theory | S45 |
| <b>Figure S10.</b> | <sup>1</sup> H-NMR spectrum for the reaction of <b>7</b> with excess of morpholine in dimethyl sulfoxide-d <sub>6</sub> .                                                                                                                                                                   | S46 |
| <b>Figure S11.</b> | <sup>1</sup> H-NMR spectrum for the reaction of <b>7</b> with excess of morpholine in chloroform-d <sub>1</sub> .                                                                                                                                                                           | S47 |
| <b>Figure S12.</b> | <sup>1</sup> H-NMR spectrum for the reaction of <b>7</b> with excess of morpholine in acetone-d <sub>6</sub> .                                                                                                                                                                              | S48 |
| <b>Figure S13.</b> | <sup>1</sup> H-NMR spectrum for the reaction of <b>7</b> with excess of morpholine in methanol-d <sub>4</sub> .                                                                                                                                                                             | S49 |
| <b>Figure S14.</b> | <sup>1</sup> H-NMR spectrum for the reaction of <b>7</b> with excess of morpholine in tetrahydrofuran-d <sub>8</sub> .                                                                                                                                                                      | S50 |
| <b>Figure S15.</b> | <sup>1</sup> H-NMR spectrum for the reaction of <b>7</b> with excess of morpholine in acetone-d <sub>6</sub>                                                                                                                                                                                | S51 |
| <b>Figure S16.</b> | <sup>1</sup> H-NMR spectrum for the reaction of <b>7</b> with excess of morpholine in methanol.                                                                                                                                                                                             | S52 |
| <b>Figure S17.</b> | <sup>1</sup> H-NMR spectrum for the reaction of <b>7</b> with excess of morpholine in acetonitrile.                                                                                                                                                                                         | S53 |
| <b>Figure S18.</b> | <sup>1</sup> H-NMR spectrum for the reaction of <b>7</b> with excess of morpholine in dimethylsulfoxide.                                                                                                                                                                                    | S54 |
| <b>Figure S19.</b> | <sup>1</sup> H-NMR spectrum for the reaction of <b>9</b> with excess of piperidine in deuterated acetonitrile-d <sub>3</sub> .                                                                                                                                                              | S55 |

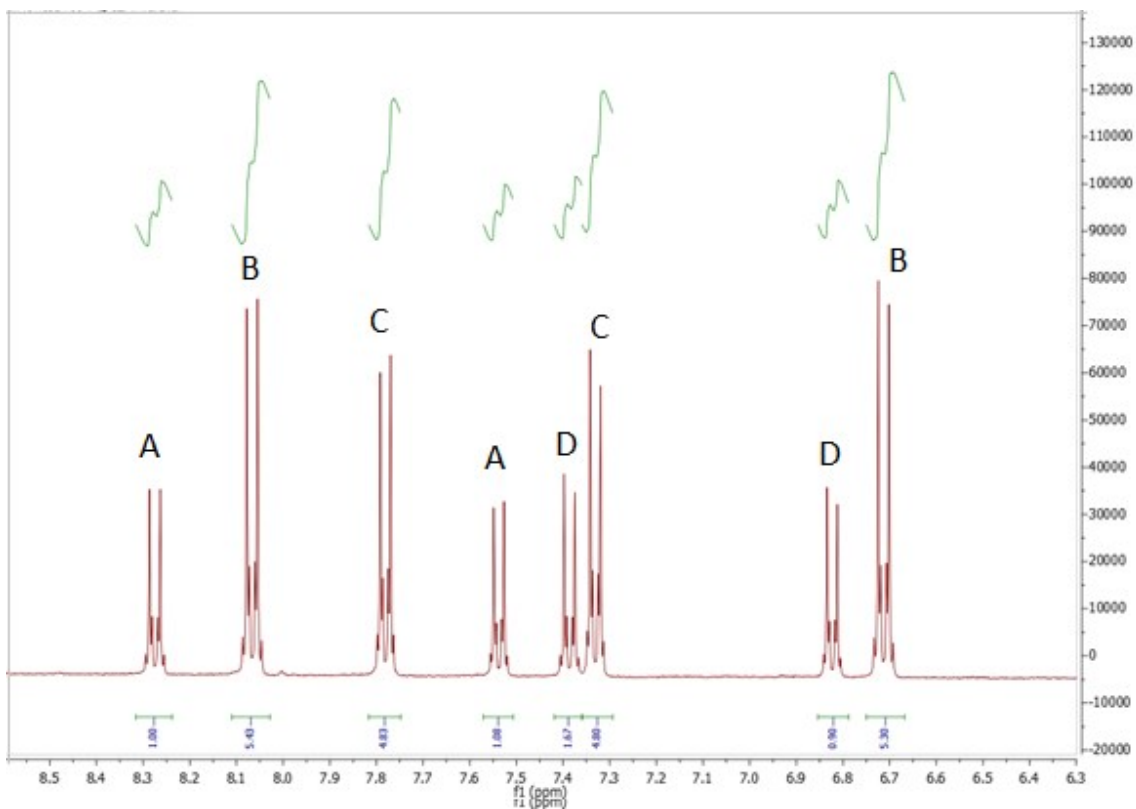

**Figure S1.-** <sup>1</sup>H-NMR spectrum for the reaction of **9** with excess of morpholine in acetonitrile-d<sub>3</sub>  
 A: Morpholine 4-nitrophenyl carbamate, B: 4-nitrophenol, C: Morpholine 4-cyanophenyl carbamate, D: 4-cyanophenol

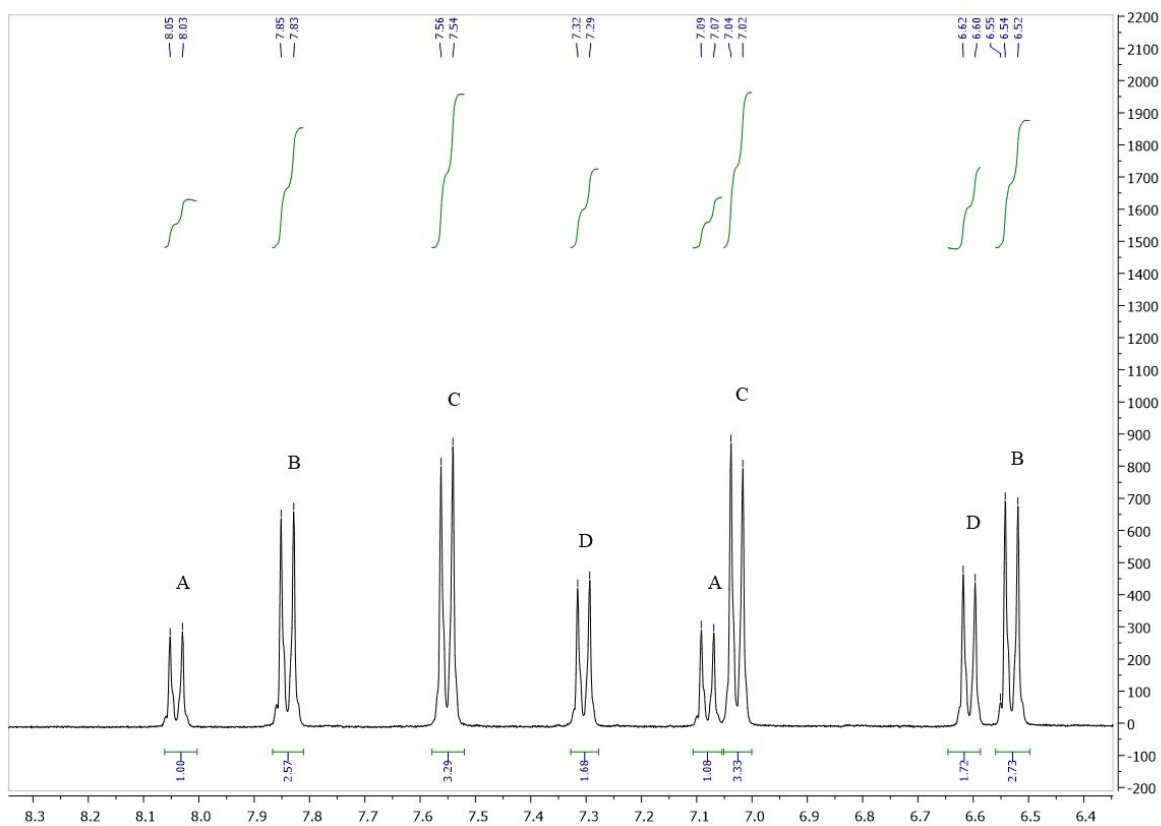

Figure S2.- <sup>1</sup>H-NMR spectrum for the reaction of **7** with excess of morpholine in deuterated acetonitrile-d<sub>3</sub>. A: Morpholine 4-nitrophenyl thiocarbamate, B: 4-nitrophenol, C: Morpholine 4-cyanophenyl thiocarbamate, D: 4-cyanophenol

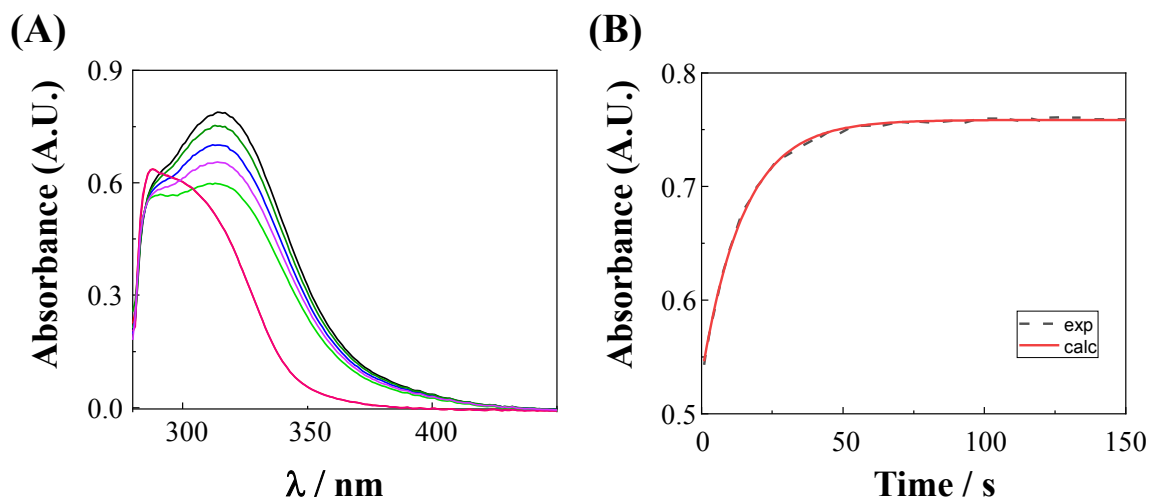

**Figure S3.-** Primary kinetic data for the reaction of **7** ( $2.7 \times 10^{-5}$  M) with piperidine ( $4.35 \times 10^{-3}$  M) in toluene solution. **(A)** Absorption spectra for such reaction at different times (0-100 s). **(B)** Representative kinetic profile (experimental and calculated by fitting) obtained at  $\lambda = 320$  nm.

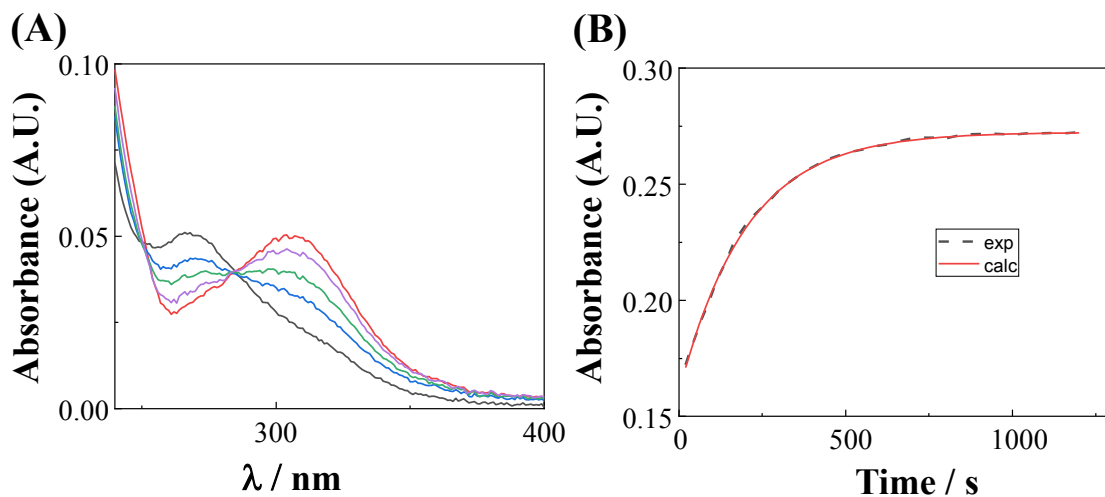

**Figure S4.-** Primary kinetic data for the reaction of **7** ( $2.7 \times 10^{-5}$  M) with 1-(2-hydroxyethyl)piperazine ( $9.0 \times 10^{-4}$  M) in acetonitrile solution. **(A)** Absorption spectra for



such reaction at different times (0-1000 s). **(B)** Representative kinetic profile (experimental and calculated by fitting) obtained at  $\lambda=300$  nm.

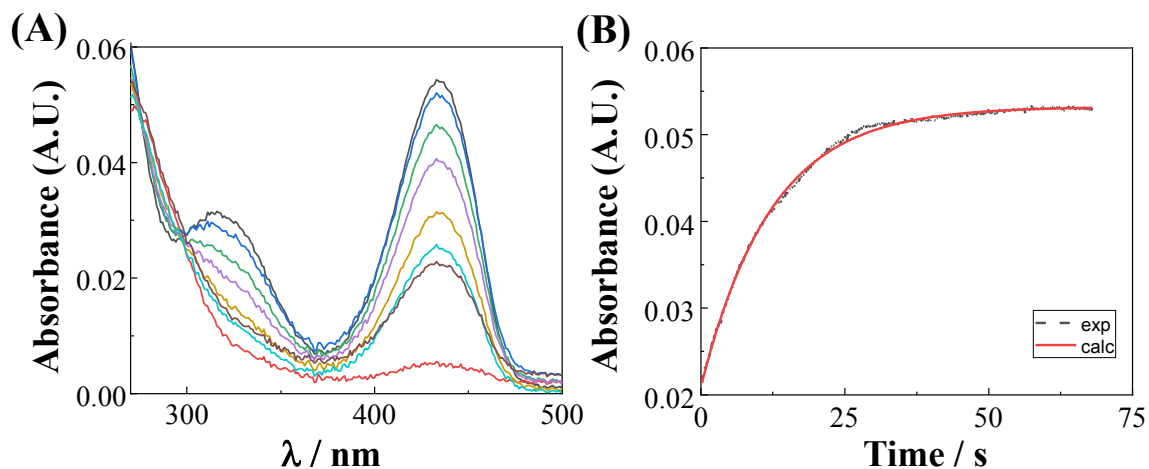

**Figure S5.-** Primary kinetic data for the reaction of **9** ( $3.0 \times 10^{-5}$  M) with morpholine ( $6.09 \times 10^{-4}$  M) in dimethyl sulfoxide solution. **(A)** Absorption spectra for such reaction at different times (0-50 s). **(B)** Representative kinetic profile (experimental and calculated by fitting) obtained at  $\lambda = 430$  nm.

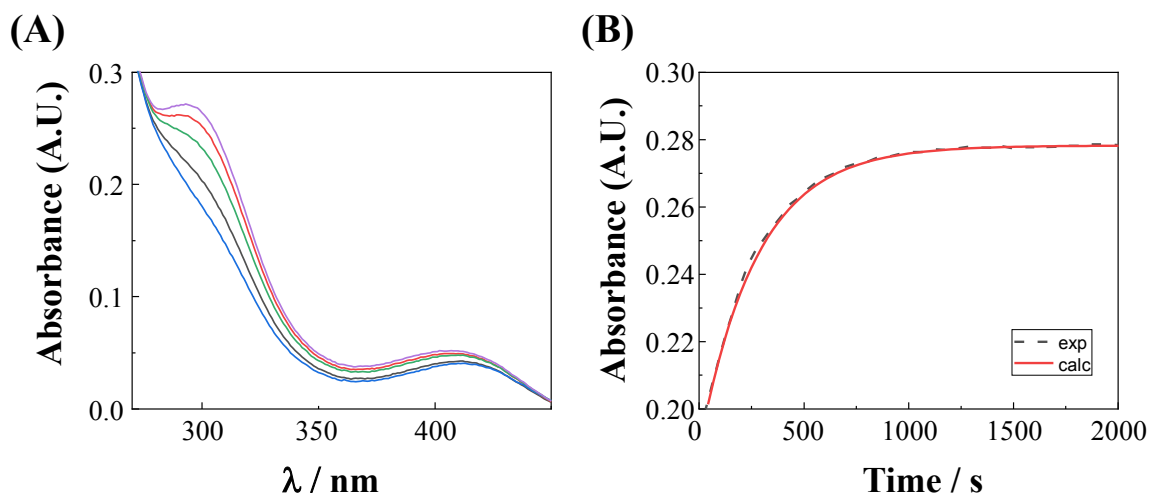

**Figure S6.-** Primary kinetic data for the reaction of **9** ( $3.0 \times 10^{-5}$  M) with morpholine ( $9.0 \times 10^{-4}$  M) in acetonitrile solution. **(A)** Absorption spectra for such reaction at different times (0-1000 s). **(B)** Representative kinetic profile (experimental and calculated by fitting) obtained at  $\lambda = 292$  nm.

**Table S1.-** Total amine concentration  $[N]_T$  and pseudo first order rate constants ( $k_{obs}$ ) for the reaction of **7** with Secondary Alicyclic Amines in Acetonitrile solution, at  $25 \pm 0.1$  ° C.

| $10^4[N]_T/M$ | $10^3 k_{obs}/s^{-1}$ |                      |                              |            |            |
|---------------|-----------------------|----------------------|------------------------------|------------|------------|
|               | Morpholine            | 1-(formyl)piperazine | 1-(2-hydroxyethyl)piperazine | Piperazine | Piperidine |
| 4.00          | 0.156                 | 1.97                 | 1.96                         | 13.1       | 14.0       |
| 5.00          | 0.439                 | 2.71                 | 2.85                         | 16.4       | 21.2       |
| 6.00          | 0.674                 |                      | 4.15                         |            | 27.6       |
| 7.00          | 0.951                 | 5.48                 |                              | 38.0       |            |
| 8.00          |                       | 6.50                 | 6.51                         |            | 44.9       |
| 9.00          | 1.42                  | 7.71                 |                              | 54.2       |            |
| 10.0          |                       | 8.90                 | 9.03                         | 59.6       | 59.8       |

**Table S2.-** Total amine concentration  $[N]_T$  and pseudo first order rate constants ( $k_{obs}$ ) for the reaction of **9** with Secondary Alicyclic Amines in Acetonitrile solution, at  $25 \pm 0.1$  ° C.

| $10^4[N]_T/M$ | $10^3 k_{obs}/s^{-1}$ |                      |                              |            |            |
|---------------|-----------------------|----------------------|------------------------------|------------|------------|
|               | Morpholine            | 1-(formyl)piperazine | 1-(2-hydroxyethyl)piperazine | Piperazine | Piperidine |
| 4.00          | 0.861                 |                      | 2.31                         | 10.8       | 54.1       |
| 5.00          | 1.02                  |                      | 2.84                         | 13.4       | 64.8       |
| 6.00          | 1.20                  |                      | 3.08                         | 15.8       | 73.8       |
| 7.00          | 1.45                  |                      | 3.60                         | 18.0       | 85.6       |
| 8.00          | 1.60                  |                      | 3.90                         | 21.5       | 100        |
| 9.00          |                       |                      | 4.48                         | 23.1       | 110        |
| 43.5          |                       | 8.02                 |                              |            |            |
| 52.2          |                       | 9.70                 |                              |            |            |
| 60.9          |                       | 12.2                 |                              |            |            |
| 69.6          |                       | 13.7                 |                              |            |            |
| 78.3          |                       | 16.3                 |                              |            |            |
| 87.0          |                       | 19.3                 |                              |            |            |

**Table S3.**- Experimental conditions and pseudo first order rate constants for the reactions of **7** with piperidine at 25°C, in different solvents.<sup>a)</sup>

| 10 <sup>4</sup> [Piperidine/M] | 10 <sup>3</sup> k <sub>obs</sub> /s <sup>-1</sup> |      |      |      |      |      |      |      |      |
|--------------------------------|---------------------------------------------------|------|------|------|------|------|------|------|------|
|                                | Tol                                               | DX   | EA   | MP   | IP   | E    | M    | AC   | DMSO |
| 4.00                           |                                                   |      |      |      |      |      |      |      | 187  |
| 5.00                           |                                                   |      |      |      |      |      |      |      | 238  |
| 6.00                           |                                                   |      |      |      |      |      |      |      | 291  |
| 7.00                           |                                                   |      |      |      |      |      |      |      | 331  |
| 8.00                           | 0.88                                              | 2.34 | 11.1 | 4.12 | 5.26 | 4.01 | 4.62 | 30.2 | 375  |
| 9.00                           | 1.25                                              | 2.97 | 13.5 | 4.80 | 6.40 | 4.67 | 5.02 | 35.0 | 446  |
| 10.0                           | 1.68                                              | 3.48 | 16.4 | 5.44 | 7.40 | 5.30 | 5.48 | 43.4 |      |
| 11.0                           | 1.97                                              | 4.12 | 18.6 | 6.13 | 8.05 | 6.42 | 5.90 | 51.5 |      |
| 12.0                           | 2.41                                              | 4.71 | 20.8 | 7.00 | 9.00 | 7.64 | 6.52 | 57.1 |      |
| 13.0                           | 2.85                                              |      | 23.0 | 7.34 | 9.90 | 8.33 | 6.91 | 64.4 |      |
| 14.0                           | 3.25                                              |      | 25.0 | 8.09 | 11.0 | 9.07 | 7.30 |      |      |

<sup>a)</sup> Toluene (Tol), Dioxane (DX), Ethyl acetate (EA), 2-Methyl propanol (MP), Isopropanol (IP), Ethanol (E), Methanol (M), Acetone (AC), Dimethyl sulfoxide (DMSO).

**Table S4.-** Total piperidine concentration and pseudo first order rate constants ( $k_{\text{obs}}$ ) for the reaction of **9** with piperidine in different solvents<sup>a)</sup>, at  $25 \pm 0.1$  ° C.

| 10 <sup>4</sup> Piperidine/M | 10 <sup>2</sup> $k_{\text{obs}}/s^{-1}$ |      |      |      |      |      |      |      |      |
|------------------------------|-----------------------------------------|------|------|------|------|------|------|------|------|
|                              | Tol                                     | DX   | EA   | AC   | E    | MP   | IP   | M    | DMSO |
| 1.17                         |                                         |      |      |      |      |      |      |      | 87.7 |
| 1.48                         |                                         |      |      |      |      |      |      |      | 105  |
| 1.78                         |                                         |      |      |      |      |      |      |      | 116  |
| 2.04                         |                                         |      |      |      |      |      |      |      | 125  |
| 2.34                         |                                         |      |      |      |      |      |      |      | 134  |
| 4.00                         |                                         | 1.41 | 2.03 | 6.08 | 1.82 | 1.45 | 1.98 | 2.54 |      |
| 5.00                         |                                         | 1.73 | 2.78 | 8.09 | 2.45 | 1.76 | 2.90 | 3.08 |      |
| 6.00                         |                                         | 1.92 | 2.96 | 9.56 | 2.53 | 2.07 | 3.50 | 3.93 |      |
| 7.00                         |                                         | 2.13 | 3.64 | 10.9 | 3.09 | 2.49 | 4.04 | 4.53 |      |
| 8.00                         |                                         | 2.55 | 3.94 | 13.5 | 4.01 | 2.62 | 4.57 | 5.20 |      |
| 9.00                         |                                         | 2.83 | 4.72 | 15.7 | 4.45 | 2.92 | 5.54 | 5.69 |      |
| 43.6                         | 6.68                                    |      |      |      |      |      |      |      |      |
| 52.2                         | 8.28                                    |      |      |      |      |      |      |      |      |
| 60.9                         | 10.1                                    |      |      |      |      |      |      |      |      |
| 69.6                         | 11.4                                    |      |      |      |      |      |      |      |      |
| 78.3                         | 13.5                                    |      |      |      |      |      |      |      |      |
| 87.0                         | 14.8                                    |      |      |      |      |      |      |      |      |

<sup>b)</sup> Toluene (Tol), Dioxane (DX), Ethyl acetate (EA), 2-Methyl propanol (MP), Isopropanol (IP), Ethanol (E), Methanol (M), Acetone (AC), Dimethyl sulfoxide (DMSO).

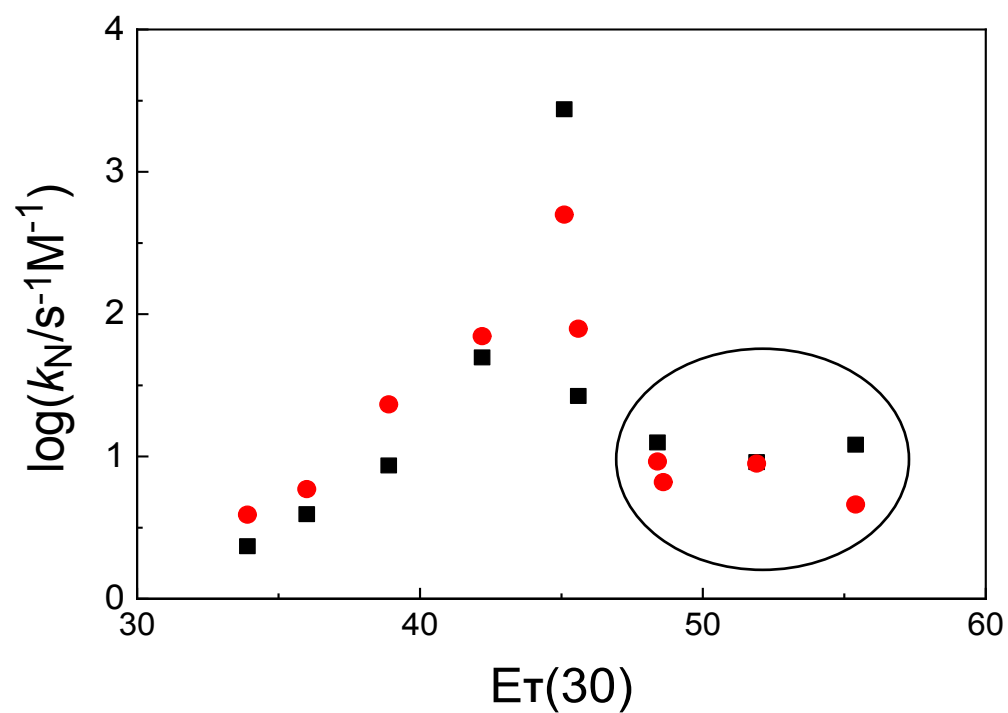

**Figure S7.-**  $\log k_N$  against  $E_T(30)$  for the reactions of 7 (●) and 9 (■) with piperidine in different solvents

**Table S5.** Statistical data from the stepwise regression procedure including Catalan's parameters for the reaction of **7** with piperidine.

| Eqn. N° | A <sub>0</sub> | b <sup>a</sup> | c <sup>a</sup> | d <sup>a</sup> | R <sup>b</sup> | F <sup>c</sup> | Prob>F               |
|---------|----------------|----------------|----------------|----------------|----------------|----------------|----------------------|
| S1      | -3.2±1.4       | 5.4±1.6        |                |                | 0.54           | 11             | 0.01                 |
| S2      | 1.5±0.3        |                | -1.4±1.0       |                | 0.08           | 1.8            | 0.21                 |
| S3      | 1.2±0.6        |                |                | 0.06±1.1       | -1.25          | 0.003          | 0.96                 |
| S4      | 1.0±0.6        |                | -1.9±1.2       | 1.0±1.2        | 0.05           | 1.2            | 0.35                 |
| S5      | -3.7±1.2       | 6.9±1.5        |                | -1.4±0.7       | 0.66           | 9.9            | 0.009                |
| S6      | -3.7±0.4       | 6.4±0.5        | -2.0±0.2       |                | 0.96           | 125            | 3.3x10 <sup>-6</sup> |
| S7      | -3.8±0.4       | 6.8±0.4        | -1.9±0.2       | -0.4±0.2       | 0.98           | 123            | 8.9x10 <sup>-6</sup> |

<sup>a</sup>)Eqn 2 coefficients, <sup>b</sup>)correlation coefficient, <sup>c</sup>)Statistical F.

**Table S6.** Statistical data from the stepwise regression procedure including Catalan's parameters for the reaction of **9** with piperidine

| Eqn. N° | A <sub>0</sub> | b <sup>a</sup> | c <sup>a</sup> | d <sup>a</sup> | R <sup>b</sup> | F <sup>c</sup> | . Prob>F |
|---------|----------------|----------------|----------------|----------------|----------------|----------------|----------|
| S8      | 0.8±0.6        | 3.2±0.7        |                |                | 0.74           | 18.5           | 0.008    |
| S9      | 1.7±0.3        |                | 0.2±0.6        |                | -0.16          | 0.16           | 0.71     |
| S10     | 1.3±0.3        |                |                | 0.7±0.6        | 0.1            | 1.7            | 0.25     |
| S11     | 1.3±0.3        |                | -0.1±0.6       | 0.8±0.7        | 0.11           | 0.7            | 0.55     |
| S12     | -1.3±0.7       | 4.2±1.0        |                | -0.5±0.4       | 0.77           | 11             | 0.024    |
| S13     | -1.4±0.4       | 4.1±0.6        | -0.6±0.2       |                | 0.88           | 24             | 0.006    |
| S14     | -1.8±0.4       | 4.7±0.7        | -0.5±0.2       | -0.5±0.2       | 0.91           | 21             | 0.015    |

**Table S7.** Bond length of the reactive center in reactant, concerted TS (CTS), first transition state (TS1), intermediate (T±), second transition state and products for the reaction of compound **7** with morpholine in acetonitrile. All bond length are in Å.

**Table S8.** Bond length of the reactive center in reactant, concerted TS (CTS), first transition state (TS1), intermediate (T±), second transition state and products for the reaction of compound **7** with piperidine in acetonitrile. All bond length are in Å.

| <b>7+morph</b> | reactant | CTS...NO2 |               |          |           |
|----------------|----------|-----------|---------------|----------|-----------|
| C=S            | 1.64     | 1.63      |               |          |           |
| S=C...O-f-NO2  | 1.35     | 2.14      |               |          |           |
| S=C...O-f-CN   | 1.35     | 1.34      |               |          |           |
| C-N            | ----     | 1.51      |               |          |           |
| H...O-NO2      | ----     | 1.78      |               |          |           |
| H...O-CN       | ----     | ----      |               |          |           |
|                |          |           | <b>7+pip</b>  | reactant | CTS...NO2 |
|                |          |           | C=S           | 1.64     | 1.63      |
|                |          |           | S=C...O-f-NO2 | 1.35     | 2.14      |
|                |          |           | S=C...O-f-CN  | 1.35     | 1.34      |
|                |          |           | C-N           | ----     | 1.50      |
|                |          |           | H...O-NO2     | ----     | 2.04      |
|                |          |           | H...O-CN      | ----     | ----      |



**Table S9.** Bond length of the reactive center in reactant, concerted TS (CTS), first transition state (TS1), intermediate (T±), second transition state and products for the reaction of compound **9** with morpholine in acetonitrile. All bond length are in Å.

**Table S10.** Bond length of the reactive center in reactant, concerted TS (CTS), first transition state (TS1), intermediate (T±), second transition state and products for the reaction of compound **9** with piperidine in acetonitrile. All Å-bond length are in Å.

**Table S11.** Total and relative ΔG energies for the structures along the concerted and stepwise

| <b>9+morph</b> | reactant | C         |          |       |      |
|----------------|----------|-----------|----------|-------|------|
| <b>9+pip</b>   | reactant | CTS...NO2 | CTS...CN | TS1   | T+-  |
| O=C...O=O      | 1.36     | 1.20      | 1.20     | 1.210 | 1.23 |
| O=C...O-f-CN   | 1.35     | 2.02      | 1.35     | 1.36  | 1.46 |
| O=C...O-f-CN   | 1.35     | 1.37      | 2.06     | 1.38  | 1.45 |
| H...O-NO2      | ----     | 1.75      | 1.51     | 2.28  | 1.61 |
| H...O-CN       | ----     | 1.84      | ----     | ----  | ---- |
| H...O-CN       | ----     | ----      | 2.07     | ----  | ---- |

|               | Compound 7 + morpholine |                                |                |                                | Compound 7 + piperidine |                                |                |                                |
|---------------|-------------------------|--------------------------------|----------------|--------------------------------|-------------------------|--------------------------------|----------------|--------------------------------|
| Leaving group | 4-nitrophenol           |                                | 4-cyanophenol  |                                | 4-nitrophenol           |                                | 4-cyanophenol  |                                |
| Structure     | G<br>[Hartree]          | $\Delta G_{rel}$<br>[kcal/mol] | G<br>[Hartree] | $\Delta G_{rel}$<br>[kcal/mol] | G<br>[Hartree]          | $\Delta G_{rel}$<br>[kcal/mol] | G<br>[Hartree] | $\Delta G_{rel}$<br>[kcal/mol] |
| Reactants     | -1633.797592            | 0                              | -1633.79759    | 0                              | -1597.88793             | 0                              | -1597.88793    | 0                              |
| CTS           | -1633.769662            | 17.52                          | -1633.76329    | 21.52                          | -1597.86576             | 13.92                          | -1597.85867    | 18.36                          |
| TS1           | -1633.780107            | 10.97                          | -1633.78011    | 10.97                          | -1597.87310             | 9.3                            | -1597.87310    | 9.3                            |
| T+-           | -1633.793062            | 2.84                           | -1633.79306    | 2.84                           | -1597.88784             | 0.1                            | -1597.88784    | 0.1                            |
| TS2           | -1633.769501            | 17.63                          | -1633.76724    | 19.05                          | -1597.86573             | 13.93                          | -1597.86354    | 15.31                          |

**Table S12.** Total and relative  $\Delta G$  energies for the structures along the concerted and stepwise mechanism of the aminolysis reaction of compounds 9 with morpholine and piperidine, in acetonitrile.

|               | Compound 9 + morpholine |                                |                |                                | Compound 9 + piperidine |                                |                |                                |
|---------------|-------------------------|--------------------------------|----------------|--------------------------------|-------------------------|--------------------------------|----------------|--------------------------------|
| Leaving group | 4-nitrophenol           |                                | 4-cyanophenol  |                                | 4-nitrophenol           |                                | 4-cyanophenol  |                                |
| Structure     | G<br>[Hartree]          | $\Delta G_{rel}$<br>[kcal/mol] | G<br>[Hartree] | $\Delta G_{rel}$<br>[kcal/mol] | G<br>[Hartree]          | $\Delta G_{rel}$<br>[kcal/mol] | G<br>[Hartree] | $\Delta G_{rel}$<br>[kcal/mol] |
| Reactants     | -1310.862799            | 0                              | -1310.862799   | 0                              | -1274.953833            | 0                              | -1274.953833   | 0                              |
| CTS           | -1310.835744            | 14.51                          | -1310.833261   | 16.07                          | -1274.929878            | 15.03                          | -1274.923457   | 19.06                          |
| TS1           | -1310.849015            | 8.64                           | -1310.849015   | 8.64                           | -1274.939976            | 8.70                           | -1274.939976   | 8.70                           |
| T+-           | -1310.852858            | 6.24                           | -1310.852858   | 6.24                           | -1274.947616            | 3.90                           | -1274.947616   | 3.90                           |
| TS2           | -1310.831436            | 17.21                          | -1310.827924   | 19.41                          | -1274.932141            | 13.61                          | -1274.928649   | 15.80                          |

**Table S13.** Cartesian coordinates, energy (u.a.) for the reactants associated to the nucleophilic attack of morpholine to compound **7** in acetonitrile, calculated using M06-2X/6-31G++(d,p) level theory

| Center Number | Atomic Number | Atomic Type | Coordinates (Angstroms) |           |           |
|---------------|---------------|-------------|-------------------------|-----------|-----------|
|               |               |             | X                       | Y         | Z         |
| 1             | 6             | 0           | -3.974832               | 0.172947  | -0.150424 |
| 2             | 6             | 0           | -2.652832               | 0.367078  | -0.533475 |
| 3             | 6             | 0           | -1.844868               | -0.747445 | -0.714070 |
| 4             | 6             | 0           | -2.305386               | -2.049596 | -0.552332 |
| 5             | 6             | 0           | -3.625197               | -2.243389 | -0.172102 |
| 6             | 6             | 0           | -4.430010               | -1.126702 | 0.024827  |
| 7             | 1             | 0           | -4.643548               | 1.009230  | 0.008164  |
| 8             | 1             | 0           | -2.251741               | 1.365186  | -0.691710 |
| 9             | 1             | 0           | -1.641895               | -2.889228 | -0.722609 |
| 10            | 1             | 0           | -4.031989               | -3.236545 | -0.032893 |
| 11            | 7             | 0           | -5.825580               | -1.332398 | 0.427897  |
| 12            | 8             | 0           | -6.215403               | -2.478331 | 0.569179  |
| 13            | 8             | 0           | -6.520546               | -0.346332 | 0.600138  |
| 14            | 8             | 0           | -0.551008               | -0.519630 | -1.171715 |
| 15            | 6             | 0           | 0.512077                | -0.817360 | -0.420465 |
| 16            | 8             | 0           | 1.565663                | -0.544096 | -1.184633 |
| 17            | 6             | 0           | 2.856088                | -0.678924 | -0.670812 |
| 18            | 6             | 0           | 3.357267                | 0.316936  | 0.156725  |
| 19            | 6             | 0           | 3.601790                | -1.772804 | -1.082998 |
| 20            | 6             | 0           | 4.669434                | 0.202128  | 0.594776  |
| 21            | 1             | 0           | 2.713960                | 1.148556  | 0.446214  |
| 22            | 6             | 0           | 4.914858                | -1.882331 | -0.642757 |
| 23            | 1             | 0           | 3.159369                | -2.515995 | -1.736003 |
| 24            | 6             | 0           | 5.443355                | -0.895034 | 0.195434  |
| 25            | 1             | 0           | 5.097701                | 0.957639  | 1.243634  |
| 26            | 1             | 0           | 5.526049                | -2.724702 | -0.944910 |
| 27            | 6             | 0           | 6.803937                | -1.005622 | 0.651633  |
| 28            | 7             | 0           | 7.898024                | -1.092363 | 1.019436  |
| 29            | 6             | 0           | -0.226509               | 2.419066  | 1.309898  |
| 30            | 6             | 0           | -1.308244               | 3.438702  | 0.972463  |
| 31            | 6             | 0           | -0.348485               | 3.831932  | -1.132415 |
| 32            | 6             | 0           | 0.748945                | 2.811025  | -0.859837 |
| 33            | 1             | 0           | -2.262110               | 3.170824  | 1.436190  |
| 34            | 1             | 0           | -0.589770               | 1.415925  | 1.054079  |
| 35            | 1             | 0           | -0.017200               | 2.426952  | 2.383398  |
| 36            | 1             | 0           | -0.608016               | 3.865422  | -2.193477 |
| 37            | 1             | 0           | -0.015455               | 4.834228  | -0.818400 |
| 38            | 1             | 0           | 0.435188                | 1.838332  | -1.259184 |
| 39            | 1             | 0           | 1.674047                | 3.096261  | -1.369879 |
| 40            | 1             | 0           | -1.011198               | 4.437713  | 1.329834  |
| 41            | 7             | 0           | 1.018726                | 2.649054  | 0.572447  |
| 42            | 1             | 0           | 1.451582                | 3.503444  | 0.920806  |
| 43            | 16            | 0           | 0.517786                | -1.381266 | 1.119066  |
| 44            | 8             | 0           | -1.535716               | 3.486305  | -0.430618 |

Total Energy (a.u.) = -1634.07816627

**Table S14.** Cartesian coordinates, energy (u.a.) for the reactants associated to the nucleophilic attack of piperidine to compound **7** in acetonitrile, calculated using M06-2X/6-31G++(d,p) level theory

| Center Number | Atomic Number | Atomic Type | Coordinates (Angstroms) |           |           |
|---------------|---------------|-------------|-------------------------|-----------|-----------|
|               |               |             | X                       | Y         | Z         |
| 1             | 6             | 0           | -4.214235               | -1.900993 | -0.734450 |
| 2             | 6             | 0           | -2.887107               | -1.870668 | -1.144919 |
| 3             | 6             | 0           | -2.074583               | -0.838791 | -0.696676 |
| 4             | 6             | 0           | -2.530229               | 0.172881  | 0.141898  |
| 5             | 6             | 0           | -3.854450               | 0.143141  | 0.553127  |
| 6             | 6             | 0           | -4.667600               | -0.893946 | 0.107087  |
| 7             | 1             | 0           | -4.886807               | -2.685246 | -1.056663 |
| 8             | 1             | 0           | -2.482046               | -2.628859 | -1.804356 |
| 9             | 1             | 0           | -1.838061               | 0.951704  | 0.443831  |
| 10            | 1             | 0           | -4.259172               | 0.906022  | 1.205642  |
| 11            | 7             | 0           | -6.067844               | -0.923017 | 0.542453  |
| 12            | 8             | 0           | -6.457325               | -0.027274 | 1.271632  |
| 13            | 8             | 0           | -6.768417               | -1.841116 | 0.152726  |
| 14            | 8             | 0           | -0.777752               | -0.795489 | -1.192167 |
| 15            | 6             | 0           | 0.263265                | -0.930900 | -0.376910 |
| 16            | 8             | 0           | 1.337886                | -0.682079 | -1.130530 |
| 17            | 6             | 0           | 2.617238                | -0.937701 | -0.648060 |
| 18            | 6             | 0           | 3.032077                | -2.249939 | -0.452601 |
| 19            | 6             | 0           | 3.466263                | 0.145312  | -0.474991 |
| 20            | 6             | 0           | 4.337474                | -2.481260 | -0.046808 |
| 21            | 1             | 0           | 2.341102                | -3.068817 | -0.615910 |
| 22            | 6             | 0           | 4.774771                | -0.086721 | -0.069613 |
| 23            | 1             | 0           | 3.109564                | 1.151520  | -0.664604 |
| 24            | 6             | 0           | 5.204853                | -1.398820 | 0.147667  |
| 25            | 1             | 0           | 4.688792                | -3.493629 | 0.115261  |
| 26            | 1             | 0           | 5.458316                | 0.741657  | 0.074900  |
| 27            | 6             | 0           | 6.559474                | -1.641974 | 0.568498  |
| 28            | 7             | 0           | 7.648621                | -1.838609 | 0.907241  |
| 29            | 6             | 0           | 0.901183                | 2.386385  | 0.889860  |
| 30            | 6             | 0           | 1.721324                | 3.670490  | 0.743930  |
| 31            | 6             | 0           | 0.060559                | 4.443733  | -0.980036 |
| 32            | 6             | 0           | -0.703087               | 3.134448  | -0.768009 |
| 33            | 1             | 0           | 2.218187                | 3.908624  | 1.690414  |
| 34            | 1             | 0           | 0.171958                | 2.510513  | 1.703230  |
| 35            | 1             | 0           | 1.536199                | 1.536926  | 1.165550  |
| 36            | 1             | 0           | -0.632740               | 5.239613  | -1.272359 |
| 37            | 1             | 0           | 0.770473                | 4.311756  | -1.807712 |
| 38            | 1             | 0           | -1.478230               | 3.288955  | -0.003451 |
| 39            | 1             | 0           | -1.213680               | 2.821222  | -1.684340 |
| 40            | 1             | 0           | 2.511283                | 3.511220  | -0.003887 |
| 41            | 7             | 0           | 0.146004                | 2.028891  | -0.313403 |
| 42            | 1             | 0           | 0.795951                | 1.796163  | -1.063696 |
| 43            | 6             | 0           | 0.823999                | 4.825658  | 0.290859  |
| 44            | 1             | 0           | 1.414267                | 5.733004  | 0.128766  |
| 45            | 1             | 0           | 0.102283                | 5.050867  | 1.088003  |
| 46            | 16            | 0           | 0.245163                | -1.364275 | 1.205934  |

Total Energy (a. u.) = -1598.18993873

**Table S15.** Cartesian coordinates, energy (u.a.) for the reactants associated to the nucleophilic attack of morpholine to compound **9** in acetonitrile, calculated using M06-2X/6-31G++(d,p) level theory

| Center Number | Atomic Number | Atomic Type | Coordinates (Angstroms) |           |           |
|---------------|---------------|-------------|-------------------------|-----------|-----------|
|               |               |             | X                       | Y         | Z         |
| 1             | 6             | 0           | 4.020723                | -0.125729 | 0.908663  |
| 2             | 6             | 0           | 2.712006                | -0.224017 | 1.358955  |
| 3             | 6             | 0           | 1.847130                | -1.130485 | 0.750896  |
| 4             | 6             | 0           | 2.263712                | -1.970391 | -0.279961 |
| 5             | 6             | 0           | 3.572074                | -1.872138 | -0.732537 |
| 6             | 6             | 0           | 4.421943                | -0.949215 | -0.135560 |
| 7             | 1             | 0           | 4.718946                | 0.573226  | 1.350588  |
| 8             | 1             | 0           | 2.355840                | 0.389180  | 2.179228  |
| 9             | 1             | 0           | 1.577483                | -2.678780 | -0.723465 |
| 10            | 1             | 0           | 3.934250                | -2.502453 | -1.534421 |
| 11            | 7             | 0           | 5.799992                | -0.844007 | -0.622700 |
| 12            | 8             | 0           | 6.135185                | -1.563952 | -1.547272 |
| 13            | 8             | 0           | 6.537671                | -0.040730 | -0.078264 |
| 14            | 8             | 0           | 0.568761                | -1.181610 | 1.277317  |
| 15            | 6             | 0           | -0.482960               | -1.195036 | 0.432056  |
| 16            | 8             | 0           | -1.576475               | -1.178678 | 1.207830  |
| 17            | 6             | 0           | -2.814183               | -1.034673 | 0.601183  |
| 18            | 6             | 0           | -3.033957               | -0.078937 | -0.387344 |
| 19            | 6             | 0           | -3.833793               | -1.840731 | 1.092107  |
| 20            | 6             | 0           | -4.314337               | 0.061228  | -0.902086 |
| 21            | 1             | 0           | -2.210659               | 0.535600  | -0.729875 |
| 22            | 6             | 0           | -5.114655               | -1.695957 | 0.577303  |
| 23            | 1             | 0           | -3.615823               | -2.566967 | 1.866401  |
| 24            | 6             | 0           | -5.352417               | -0.746761 | -0.422596 |
| 25            | 1             | 0           | -4.512331               | 0.798128  | -1.672122 |
| 26            | 1             | 0           | -5.925180               | -2.315538 | 0.943259  |
| 27            | 6             | 0           | -6.676814               | -0.598028 | -0.963834 |
| 28            | 7             | 0           | -7.741540               | -0.477789 | -1.402169 |
| 29            | 6             | 0           | -1.093247               | 2.721801  | 0.773345  |
| 30            | 6             | 0           | -0.298013               | 4.022427  | 0.757072  |
| 31            | 6             | 0           | 1.239625                | 3.120153  | -0.761916 |
| 32            | 6             | 0           | 0.487257                | 1.795855  | -0.786230 |
| 33            | 1             | 0           | -0.949686               | 4.888940  | 0.897711  |
| 34            | 1             | 0           | -1.887832               | 2.781466  | 0.018714  |
| 35            | 1             | 0           | -1.565599               | 2.571068  | 1.748371  |
| 36            | 1             | 0           | 1.708604                | 3.329981  | -1.726840 |
| 37            | 1             | 0           | 2.027504                | 3.079576  | 0.009521  |
| 38            | 1             | 0           | -0.238165               | 1.807846  | -1.609989 |
| 39            | 1             | 0           | 1.175877                | 0.963305  | -0.964457 |
| 40            | 1             | 0           | 0.448054                | 4.009040  | 1.569155  |
| 41            | 8             | 0           | 0.355373                | 4.196121  | -0.490394 |
| 42            | 7             | 0           | -0.254960               | 1.559686  | 0.457287  |
| 43            | 1             | 0           | 0.415165                | 1.439672  | 1.217345  |
| 44            | 8             | 0           | -0.443197               | -1.271739 | -0.762110 |

Total Energy (a. u.) = -1311.14581172

**Table S16.** Cartesian coordinates, energy (u.a.) for the reactants associated to the nucleophilic attack of piperidine to compound **9** in acetonitrile, calculated using M06-2X/6-31G++(d,p) level theory

| Center Number | Atomic Number | Atomic Type | Coordinates (Angstroms) |           |           |
|---------------|---------------|-------------|-------------------------|-----------|-----------|
|               |               |             | X                       | Y         | Z         |
| 1             | 6             | 0           | 4.426925                | -1.532400 | 0.812007  |
| 2             | 6             | 0           | 3.120918                | -1.721955 | 1.237032  |
| 3             | 6             | 0           | 2.087596                | -1.044053 | 0.594905  |
| 4             | 6             | 0           | 2.323943                | -0.169935 | -0.465589 |
| 5             | 6             | 0           | 3.630875                | 0.018284  | -0.892191 |
| 6             | 6             | 0           | 4.656223                | -0.665303 | -0.249292 |
| 7             | 1             | 0           | 5.254515                | -2.042735 | 1.287348  |
| 8             | 1             | 0           | 2.887788                | -2.384980 | 2.061699  |
| 9             | 1             | 0           | 1.500086                | 0.351216  | -0.934026 |
| 10            | 1             | 0           | 3.859345                | 0.689385  | -1.710277 |
| 11            | 7             | 0           | 6.032006                | -0.459181 | -0.704052 |
| 12            | 8             | 0           | 6.218882                | 0.308157  | -1.633322 |
| 13            | 8             | 0           | 6.921147                | -1.064676 | -0.129397 |
| 14            | 8             | 0           | 0.833877                | -1.240549 | 1.136379  |
| 15            | 6             | 0           | -0.246260               | -1.230841 | 0.337590  |
| 16            | 8             | 0           | -1.310154               | -1.226310 | 1.164126  |
| 17            | 6             | 0           | -2.581711               | -1.192583 | 0.614368  |
| 18            | 6             | 0           | -2.980487               | -2.073542 | -0.386767 |
| 19            | 6             | 0           | -3.458092               | -0.267892 | 1.173684  |
| 20            | 6             | 0           | -4.286102               | -2.005296 | -0.852377 |
| 21            | 1             | 0           | -2.282859               | -2.792302 | -0.795847 |
| 22            | 6             | 0           | -4.763228               | -0.202154 | 0.707508  |
| 23            | 1             | 0           | -3.114508               | 0.383192  | 1.969796  |
| 24            | 6             | 0           | -5.174283               | -1.069274 | -0.310232 |
| 25            | 1             | 0           | -4.620361               | -2.679006 | -1.632960 |
| 26            | 1             | 0           | -5.459536               | 0.514632  | 1.126946  |
| 27            | 6             | 0           | -6.525598               | -1.003444 | -0.799125 |
| 28            | 7             | 0           | -7.613171               | -0.949852 | -1.191912 |
| 29            | 6             | 0           | -1.070493               | 1.843873  | -0.748581 |
| 30            | 6             | 0           | -1.781984               | 3.194796  | -0.653400 |
| 31            | 6             | 0           | -0.032334               | 3.911976  | 1.008470  |
| 32            | 6             | 0           | 0.617223                | 2.535141  | 0.849314  |
| 33            | 1             | 0           | -2.273523               | 3.429262  | -1.603650 |
| 34            | 1             | 0           | -0.342409               | 1.869114  | -1.572551 |
| 35            | 1             | 0           | -1.778243               | 1.039302  | -0.976042 |
| 36            | 1             | 0           | 0.729460                | 4.661590  | 1.248156  |
| 37            | 1             | 0           | -0.731801               | 3.878581  | 1.854716  |
| 38            | 1             | 0           | 1.385074                | 2.584067  | 0.064233  |
| 39            | 1             | 0           | 1.120109                | 2.225495  | 1.771069  |
| 40            | 1             | 0           | -2.569639               | 3.123294  | 0.109655  |
| 41            | 7             | 0           | -0.334717               | 1.486039  | 0.468443  |
| 42            | 1             | 0           | -1.004522               | 1.381956  | 1.230706  |
| 43            | 6             | 0           | -0.790092               | 4.294724  | -0.265605 |
| 44            | 1             | 0           | -1.305885               | 5.251153  | -0.134632 |
| 45            | 1             | 0           | -0.068791               | 4.430453  | -1.083164 |
| 46            | 8             | 0           | -0.265172               | -1.298303 | -0.857640 |

Total Energy (a. u.) = -1275.26125082

**Table S17.** Cartesian coordinates, energy (u.a.) and number of imaginary frequencies (NIMAG) for Transition State (TS1) associated to the nucleophilic attack of morpholine to compound **7** in acetonitrile, calculated using M06-2X/6-31G++(d,p) level theory

| Center Number | Atomic Number | Atomic Type | Coordinates (Angstroms) |           |           |
|---------------|---------------|-------------|-------------------------|-----------|-----------|
|               |               |             | X                       | Y         | Z         |
| 1             | 6             | 0           | -3.219244               | -1.910648 | -0.211782 |
| 2             | 6             | 0           | -1.886594               | -1.604909 | 0.016240  |
| 3             | 6             | 0           | -1.502849               | -0.275040 | 0.181051  |
| 4             | 6             | 0           | -2.423590               | 0.767947  | 0.106026  |
| 5             | 6             | 0           | -3.760224               | 0.463026  | -0.116580 |
| 6             | 6             | 0           | -4.133268               | -0.865743 | -0.268557 |
| 7             | 1             | 0           | -3.549964               | -2.932892 | -0.342111 |
| 8             | 1             | 0           | -1.132698               | -2.382377 | 0.063928  |
| 9             | 1             | 0           | -2.107980               | 1.794056  | 0.224460  |
| 10            | 1             | 0           | -4.506130               | 1.244688  | -0.182111 |
| 11            | 7             | 0           | -5.544436               | -1.176803 | -0.508204 |
| 12            | 8             | 0           | -6.337326               | -0.251118 | -0.533602 |
| 13            | 8             | 0           | -5.851580               | -2.345440 | -0.669951 |
| 14            | 8             | 0           | -0.140705               | -0.093451 | 0.322016  |
| 15            | 6             | 0           | 0.461407                | 0.702324  | 1.236338  |
| 16            | 8             | 0           | 1.684422                | 0.207870  | 1.559766  |
| 17            | 6             | 0           | 2.216807                | -0.888587 | 0.893341  |
| 18            | 6             | 0           | 1.691591                | -2.158197 | 1.122499  |
| 19            | 6             | 0           | 3.331313                | -0.691030 | 0.088409  |
| 20            | 6             | 0           | 2.277931                | -3.251962 | 0.505539  |
| 21            | 1             | 0           | 0.839356                | -2.276829 | 1.782478  |
| 22            | 6             | 0           | 3.922662                | -1.787441 | -0.528597 |
| 23            | 1             | 0           | 3.741544                | 0.304831  | -0.040273 |
| 24            | 6             | 0           | 3.390845                | -3.063653 | -0.324706 |
| 25            | 1             | 0           | 1.882258                | -4.248274 | 0.665960  |
| 26            | 1             | 0           | 4.791876                | -1.655292 | -1.162615 |
| 27            | 6             | 0           | 4.000033                | -4.198189 | -0.966576 |
| 28            | 7             | 0           | 4.490642                | -5.109794 | -1.484287 |
| 29            | 6             | 0           | 2.182770                | 2.969303  | 0.345334  |
| 30            | 6             | 0           | 2.702234                | 3.985083  | -0.665680 |
| 31            | 6             | 0           | 0.805757                | 3.706751  | -2.005215 |
| 32            | 6             | 0           | 0.225074                | 2.683626  | -1.034606 |
| 33            | 1             | 0           | 3.288146                | 4.759714  | -0.166012 |
| 34            | 1             | 0           | 1.605389                | 3.481893  | 1.123776  |
| 35            | 1             | 0           | 3.005294                | 2.433749  | 0.827393  |
| 36            | 1             | 0           | 0.007471                | 4.276242  | -2.486276 |
| 37            | 1             | 0           | 1.389637                | 3.191695  | -2.784509 |
| 38            | 1             | 0           | -0.408381               | 3.199805  | -0.301775 |
| 39            | 1             | 0           | -0.373694               | 1.939482  | -1.567483 |
| 40            | 1             | 0           | 3.342917                | 3.481796  | -1.407256 |
| 41            | 7             | 0           | 1.278542                | 2.002779  | -0.280528 |
| 42            | 1             | 0           | 1.792466                | 1.373748  | -0.899393 |
| 43            | 16            | 0           | -0.294752               | 1.704979  | 2.340745  |
| 44            | 8             | 0           | 1.625108                | 4.635273  | -1.318709 |

Total Energy (a.u.) = -1634.06436923; NIMAG = i168.79

**Table S18.-** Cartesian coordinates, energy (u.a.) and number of imaginary frequencies (NIMAG) for concerted Transition State (CTS) associated to the departure of 4-nitrophenol for the reaction of compound **7** with morpholine in acetonitrile, calculated using M06-2X/6-31G++(d,p) level theory

| Center Number | Atomic Number | Atomic Type | Coordinates (Angstroms) |           |           |
|---------------|---------------|-------------|-------------------------|-----------|-----------|
|               |               |             | X                       | Y         | Z         |
| 1             | 6             | 0           | -3.784798               | -0.949489 | -0.770951 |
| 2             | 6             | 0           | -2.767942               | -0.093759 | -1.133665 |
| 3             | 6             | 0           | -1.404445               | -0.380007 | -0.822525 |
| 4             | 6             | 0           | -1.136002               | -1.584895 | -0.108765 |
| 5             | 6             | 0           | -2.154939               | -2.439813 | 0.261123  |
| 6             | 8             | 0           | -0.457718               | 0.430408  | -1.166528 |
| 7             | 6             | 0           | -3.473904               | -2.119708 | -0.069324 |
| 8             | 1             | 0           | -4.817790               | -0.732786 | -1.015612 |
| 9             | 1             | 0           | -2.982832               | 0.817528  | -1.684142 |
| 10            | 1             | 0           | -0.105675               | -1.826782 | 0.128526  |
| 11            | 1             | 0           | -1.949480               | -3.357787 | 0.798751  |
| 12            | 7             | 0           | -4.535019               | -3.015164 | 0.314276  |
| 13            | 8             | 0           | -5.687312               | -2.723539 | 0.011029  |
| 14            | 8             | 0           | -4.248243               | -4.035769 | 0.931194  |
| 15            | 6             | 0           | 0.760294                | 1.304475  | 0.374180  |
| 16            | 6             | 0           | 2.636332                | 0.047989  | -0.267902 |
| 17            | 6             | 0           | 3.093082                | -2.172178 | -1.010920 |
| 18            | 6             | 0           | 2.289673                | -1.040695 | -1.057820 |
| 19            | 6             | 0           | 3.751688                | 0.058863  | 0.557198  |
| 20            | 1             | 0           | 1.403617                | -0.977504 | -1.678961 |
| 21            | 6             | 0           | 4.554936                | -1.073365 | 0.599624  |
| 22            | 1             | 0           | 3.981161                | 0.938352  | 1.147502  |
| 23            | 6             | 0           | 4.221651                | -2.185305 | -0.182447 |
| 24            | 1             | 0           | 5.434644                | -1.097710 | 1.232023  |
| 25            | 1             | 0           | 2.852198                | -3.039928 | -1.614123 |
| 26            | 6             | 0           | 5.055214                | -3.357958 | -0.140554 |
| 27            | 7             | 0           | 5.724576                | -4.301687 | -0.108703 |
| 28            | 6             | 0           | -1.241152               | 2.824645  | 0.499024  |
| 29            | 6             | 0           | -1.808592               | 4.089295  | -0.125537 |
| 30            | 6             | 0           | 0.303914                | 5.003368  | -0.458137 |
| 31            | 6             | 0           | 0.999583                | 3.779610  | 0.120720  |
| 32            | 1             | 0           | 0.216364                | 4.903467  | -1.550116 |
| 33            | 1             | 0           | 0.906217                | 5.885547  | -0.237316 |
| 34            | 1             | 0           | 1.141775                | 3.871813  | 1.199527  |
| 35            | 1             | 0           | 1.951744                | 3.588299  | -0.371547 |
| 36            | 1             | 0           | -2.776354               | 4.302058  | 0.330266  |
| 37            | 1             | 0           | -1.955796               | 3.950858  | -1.207675 |
| 38            | 1             | 0           | -1.107173               | 2.942063  | 1.574451  |
| 39            | 1             | 0           | -1.856140               | 1.949379  | 0.290908  |
| 40            | 8             | 0           | 1.867499                | 1.205253  | -0.367661 |
| 41            | 7             | 0           | 0.115579                | 2.575494  | -0.089334 |
| 42            | 1             | 0           | -0.023953               | 2.389714  | -1.095500 |
| 43            | 8             | 0           | -0.967101               | 5.196329  | 0.123301  |
| 44            | 16            | 0           | 0.445435                | 0.614689  | 1.819297  |

Total Energy (a.u.) = -1634.05525116-; NIMAG =i207.16



**Table S19.** Cartesian coordinates, energy (u.a.) and number of imaginary frequencies (NIMAG) for concerted Transition State (CTS) associated to the departure of 4-cyanophenol for the reaction of compound **7** with morpholine in acetonitrile, calculated using M06-2X/6-31G++(d,p) level theory

| Center Number | Atomic Number | Atomic Type | Coordinates (Angstroms) |           |           |
|---------------|---------------|-------------|-------------------------|-----------|-----------|
|               |               |             | X                       | Y         | Z         |
| 1             | 6             | 0           | 1.882506                | -2.969930 | -0.623751 |
| 2             | 6             | 0           | 0.607478                | -2.423385 | -0.677997 |
| 3             | 6             | 0           | 0.403733                | -1.138558 | -0.190044 |
| 4             | 6             | 0           | 1.428782                | -0.368491 | 0.349750  |
| 5             | 6             | 0           | 2.703298                | -0.916060 | 0.405873  |
| 6             | 8             | 0           | -0.890456               | -0.647583 | -0.352727 |
| 7             | 6             | 0           | 2.903653                | -2.202780 | -0.079368 |
| 8             | 1             | 0           | 2.084759                | -3.967129 | -0.992112 |
| 9             | 1             | 0           | -0.226251               | -2.977122 | -1.093553 |
| 10            | 1             | 0           | 1.238849                | 0.634952  | 0.710323  |
| 11            | 1             | 0           | 3.533528                | -0.353573 | 0.814033  |
| 12            | 7             | 0           | 4.252817                | -2.774796 | -0.017132 |
| 13            | 8             | 0           | 5.136613                | -2.098322 | 0.479048  |
| 14            | 8             | 0           | 4.417130                | -3.896628 | -0.464209 |
| 15            | 6             | 0           | -1.617776               | -0.194280 | 0.659938  |
| 16            | 6             | 0           | -0.589889               | 2.355645  | -0.156755 |
| 17            | 6             | 0           | 1.407869                | 3.312593  | 0.888832  |
| 18            | 6             | 0           | 0.075308                | 2.949163  | 0.957204  |
| 19            | 6             | 0           | 0.171436                | 2.190901  | -1.352871 |
| 20            | 1             | 0           | -0.495862               | 3.105231  | 1.866638  |
| 21            | 6             | 0           | 1.499470                | 2.556125  | -1.419108 |
| 22            | 1             | 0           | -0.322056               | 1.747715  | -2.212786 |
| 23            | 6             | 0           | 2.139268                | 3.109495  | -0.293933 |
| 24            | 1             | 0           | 2.064564                | 2.407132  | -2.334278 |
| 25            | 1             | 0           | 1.900360                | 3.751338  | 1.751449  |
| 26            | 6             | 0           | 3.521108                | 3.472992  | -0.355735 |
| 27            | 7             | 0           | 4.643237                | 3.765949  | -0.402782 |
| 28            | 6             | 0           | -3.272969               | -0.221855 | -1.271278 |
| 29            | 6             | 0           | -4.762629               | -0.093544 | -1.540153 |
| 30            | 6             | 0           | -5.331118               | -1.087591 | 0.477816  |
| 31            | 6             | 0           | -3.874798               | -1.245367 | 0.890848  |
| 32            | 1             | 0           | -5.731450               | -0.142165 | 0.873095  |
| 33            | 1             | 0           | -5.904331               | -1.911573 | 0.905356  |
| 34            | 1             | 0           | -3.464413               | -2.201423 | 0.558673  |
| 35            | 1             | 0           | -3.750667               | -1.136789 | 1.967287  |
| 36            | 1             | 0           | -4.930718               | -0.166994 | -2.615595 |
| 37            | 1             | 0           | -5.132322               | 0.883880  | -1.195201 |
| 38            | 1             | 0           | -2.897839               | -1.183878 | -1.619653 |
| 39            | 1             | 0           | -2.699439               | 0.600548  | -1.693543 |
| 40            | 8             | 0           | -1.802748               | 1.932413  | -0.071347 |
| 41            | 7             | 0           | -3.053350               | -0.171043 | 0.221797  |
| 42            | 1             | 0           | -3.353403               | 0.763311  | 0.536526  |
| 43            | 8             | 0           | -5.482012               | -1.140729 | -0.923206 |
| 44            | 16            | 0           | -1.225552               | -0.081118 | 2.237755  |

Total Energy (a.u.)=-1634.04844247; NIMAG =i187.82

**Table S20.** Cartesian coordinates, energy (u.a.) for the intermediate structure (T±) associated to the reaction of compound **7** with morpholine in acetonitrile, calculated using M06-2X/6-31G++(d,p) level theory

| Center Number | Atomic Number | Atomic Type | Coordinates (Angstroms) |           |           |
|---------------|---------------|-------------|-------------------------|-----------|-----------|
|               |               |             | X                       | Y         | Z         |
| 1             | 6             | 0           | 3.340555                | 0.669421  | -0.926210 |
| 2             | 6             | 0           | 1.966633                | 0.545400  | -1.063039 |
| 3             | 6             | 0           | 4.012556                | -0.271423 | -0.155805 |
| 4             | 1             | 0           | 3.884977                | 1.475883  | -1.400263 |
| 5             | 6             | 0           | 1.294531                | -0.507457 | -0.438577 |
| 6             | 1             | 0           | 1.394688                | 1.255070  | -1.650156 |
| 7             | 6             | 0           | 3.360573                | -1.328681 | 0.467542  |
| 8             | 7             | 0           | 5.461822                | -0.148557 | 0.000171  |
| 9             | 6             | 0           | 1.986020                | -1.452901 | 0.321809  |
| 10            | 1             | 0           | 3.926765                | -2.043146 | 1.051199  |
| 11            | 8             | 0           | 6.038069                | -0.983220 | 0.677650  |
| 12            | 8             | 0           | 6.020577                | 0.782341  | -0.555681 |
| 13            | 1             | 0           | 1.458370                | -2.262393 | 0.806339  |
| 14            | 1             | 0           | -2.016887               | -1.765646 | -1.289404 |
| 15            | 7             | 0           | -1.813649               | -2.017755 | -0.313416 |
| 16            | 6             | 0           | -0.945713               | -3.233792 | -0.307676 |
| 17            | 6             | 0           | -3.109514               | -2.306386 | 0.381674  |
| 18            | 6             | 0           | -3.760785               | -3.529252 | -0.246901 |
| 19            | 1             | 0           | -3.738549               | -1.421240 | 0.298287  |
| 20            | 1             | 0           | 0.148338                | 1.563992  | 0.713588  |
| 21            | 6             | 0           | -1.712660               | -4.411992 | -0.892602 |
| 22            | 1             | 0           | -3.864534               | 1.812091  | -0.802529 |
| 23            | 1             | 0           | -4.666645               | -3.771355 | 0.310511  |
| 24            | 1             | 0           | -4.038790               | -3.325759 | -1.291873 |
| 25            | 1             | 0           | -2.855117               | -2.486582 | 1.426843  |
| 26            | 8             | 0           | -0.046337               | -0.590563 | -0.720670 |
| 27            | 1             | 0           | -1.094331               | -5.307402 | -0.814417 |
| 28            | 1             | 0           | -0.682343               | -3.413513 | 0.736869  |
| 29            | 1             | 0           | -0.053687               | -3.015207 | -0.895458 |
| 30            | 6             | 0           | -0.617698               | 3.539566  | 0.396685  |
| 31            | 6             | 0           | -1.870563               | 1.544041  | -0.064897 |
| 32            | 6             | 0           | -2.886197               | 3.696999  | -0.443865 |
| 33            | 8             | 0           | -2.070983               | 0.199659  | -0.162747 |
| 34            | 6             | 0           | -2.964713               | 2.316382  | -0.469056 |
| 35            | 6             | 0           | -1.706033               | 4.316103  | -0.010854 |
| 36            | 1             | 0           | -1.933447               | -4.233531 | -1.955914 |
| 37            | 6             | 0           | -1.085500               | -0.735154 | 0.237599  |
| 38            | 6             | 0           | -0.692655               | 2.152833  | 0.374325  |
| 39            | 1             | 0           | 0.293238                | 4.021164  | 0.734687  |
| 40            | 6             | 0           | -1.614315               | 5.749277  | 0.016496  |
| 41            | 1             | 0           | -3.732592               | 4.297756  | -0.756910 |
| 42            | 7             | 0           | -1.539867               | 6.904936  | 0.038577  |
| 43            | 16            | 0           | -0.715669               | -0.820664 | 1.945871  |
| 44            | 8             | 0           | -2.904327               | -4.650445 | -0.175120 |

Total Energy (a.u.) = -1634.08136877

**Table S21.** Cartesian coordinates, energy (u.a.) and number of imaginary frequencies (NIMAG) for Transition State (TS2) associated to the departure of 4-nitrophenol from the reaction of compound 7 with morpholine, calculated using M06-2X/6-31G++(d,p) level theory

| Center Number | Atomic Number | Atomic Type | Coordinates (Angstroms) |           |           |
|---------------|---------------|-------------|-------------------------|-----------|-----------|
|               |               |             | X                       | Y         | Z         |
| 1             | 6             | 0           | -3.784564               | -0.949775 | -0.771331 |
| 2             | 6             | 0           | -2.767699               | -0.094025 | -1.133971 |
| 3             | 6             | 0           | -1.404267               | -0.380023 | -0.822296 |
| 4             | 6             | 0           | -1.135875               | -1.584712 | -0.108192 |
| 5             | 6             | 0           | -2.154821               | -2.439639 | 0.261624  |
| 6             | 6             | 0           | -3.473712               | -2.119762 | -0.069298 |
| 7             | 1             | 0           | -4.817512               | -0.733272 | -1.016366 |
| 8             | 1             | 0           | -2.982526               | 0.817097  | -1.684746 |
| 9             | 1             | 0           | -0.105572               | -1.826467 | 0.129353  |
| 10            | 1             | 0           | -1.949413               | -3.357475 | 0.799519  |
| 11            | 7             | 0           | -4.534760               | -3.015261 | 0.314248  |
| 12            | 8             | 0           | -4.247892               | -4.035372 | 0.931944  |
| 13            | 8             | 0           | -5.686965               | -2.724130 | 0.010177  |
| 14            | 8             | 0           | -0.457498               | 0.430350  | -1.166206 |
| 15            | 6             | 0           | 0.760529                | 1.304791  | 0.374271  |
| 16            | 8             | 0           | 1.867587                | 1.205391  | -0.367745 |
| 17            | 6             | 0           | 2.636206                | 0.047962  | -0.268060 |
| 18            | 6             | 0           | 3.751270                | 0.058365  | 0.557449  |
| 19            | 6             | 0           | 2.289600                | -1.040439 | -1.058408 |
| 20            | 6             | 0           | 4.554249                | -1.074060 | 0.599886  |
| 21            | 1             | 0           | 3.980758                | 0.937621  | 1.148093  |
| 22            | 6             | 0           | 3.092738                | -2.172118 | -1.011484 |
| 23            | 1             | 0           | 1.403761                | -0.976982 | -1.679835 |
| 24            | 6             | 0           | 4.220991                | -2.185730 | -0.182584 |
| 25            | 1             | 0           | 5.433699                | -1.098767 | 1.232627  |
| 26            | 1             | 0           | 2.851834                | -3.039686 | -1.614937 |
| 27            | 6             | 0           | 5.054210                | -3.358625 | -0.140595 |
| 28            | 7             | 0           | 5.723284                | -4.302558 | -0.108706 |
| 29            | 16            | 0           | 0.445930                | 0.615383  | 1.819629  |
| 30            | 6             | 0           | 0.999786                | 3.779810  | 0.119761  |
| 31            | 6             | 0           | 0.303736                | 5.003619  | -0.458568 |
| 32            | 6             | 0           | -1.808556               | 4.089476  | -0.125075 |
| 33            | 6             | 0           | -1.240860               | 2.824913  | 0.499409  |
| 34            | 1             | 0           | 0.906131                | 5.885785  | -0.237945 |
| 35            | 1             | 0           | 1.143009                | 3.872018  | 1.198430  |
| 36            | 1             | 0           | 1.951466                | 3.588405  | -0.373402 |
| 37            | 1             | 0           | -2.776234               | 4.302232  | 0.330902  |
| 38            | 1             | 0           | -1.955935               | 3.950910  | -1.207172 |
| 39            | 1             | 0           | -1.106432               | 2.942436  | 1.574767  |
| 40            | 1             | 0           | -1.855940               | 1.949630  | 0.291615  |
| 41            | 1             | 0           | 0.215646                | 4.903845  | -1.550516 |
| 42            | 7             | 0           | 0.115630                | 2.575667  | -0.089476 |
| 43            | 1             | 0           | -0.024295               | 2.389471  | -1.095495 |
| 44            | 8             | 0           | -0.967002               | 5.196508  | 0.123500  |

Total Energy (a.u.) = -1634.05525114; NIMAG = i207.13

**Table S22.** Cartesian coordinates, energy (u.a.) and number of imaginary frequencies (NIMAG) for Transition State (TS2) associated to the departure of 4-cyanophenol from the reaction of compound 7 with morpholine, calculated using M06-2X/6-31G++(d,p) level theory

| Center Number | Atomic Number | Atomic Type | Coordinates (Angstroms) |           |           |
|---------------|---------------|-------------|-------------------------|-----------|-----------|
|               |               |             | X                       | Y         | Z         |
| 1             | 6             | 0           | 4.181785                | -0.943685 | 0.560466  |
| 2             | 6             | 0           | 2.949155                | -1.580273 | 0.497828  |
| 3             | 6             | 0           | 1.945068                | -1.005562 | -0.268641 |
| 4             | 6             | 0           | 2.114150                | 0.175035  | -0.982241 |
| 5             | 6             | 0           | 3.344994                | 0.814303  | -0.916808 |
| 6             | 6             | 0           | 4.349897                | 0.240916  | -0.145972 |
| 7             | 1             | 0           | 4.998781                | -1.349419 | 1.142899  |
| 8             | 1             | 0           | 2.761764                | -2.505822 | 1.029280  |
| 9             | 1             | 0           | 1.281079                | 0.558409  | -1.560859 |
| 10            | 1             | 0           | 3.532586                | 1.736152  | -1.452344 |
| 11            | 7             | 0           | 5.651739                | 0.915005  | -0.079392 |
| 12            | 8             | 0           | 5.784609                | 1.960675  | -0.690911 |
| 13            | 8             | 0           | 6.530420                | 0.393213  | 0.584562  |
| 14            | 8             | 0           | 0.734208                | -1.680643 | -0.383519 |
| 15            | 6             | 0           | -0.293074               | -1.285146 | 0.374379  |
| 16            | 8             | 0           | -1.004528               | 0.075463  | -1.179349 |
| 17            | 6             | 0           | -1.555748               | 1.186571  | -0.802976 |
| 18            | 6             | 0           | -2.924561               | 1.467074  | -1.082824 |
| 19            | 6             | 0           | -0.826578               | 2.171520  | -0.078929 |
| 20            | 6             | 0           | -3.516297               | 2.646748  | -0.680389 |
| 21            | 1             | 0           | -3.490976               | 0.726598  | -1.640972 |
| 22            | 6             | 0           | -1.423076               | 3.350682  | 0.327805  |
| 23            | 1             | 0           | 0.218570                | 1.980462  | 0.141520  |
| 24            | 6             | 0           | -2.772473               | 3.602817  | 0.033889  |
| 25            | 1             | 0           | -4.558609               | 2.843877  | -0.911480 |
| 26            | 1             | 0           | -0.849460               | 4.092319  | 0.875309  |
| 27            | 6             | 0           | -3.385240               | 4.825166  | 0.454105  |
| 28            | 7             | 0           | -3.881964               | 5.816743  | 0.795908  |
| 29            | 6             | 0           | -2.753116               | -1.763376 | 0.554354  |
| 30            | 6             | 0           | -3.849445               | -2.602620 | -0.082282 |
| 31            | 6             | 0           | -2.382504               | -4.336722 | -0.578374 |
| 32            | 6             | 0           | -1.191405               | -3.591647 | 0.005580  |
| 33            | 1             | 0           | -4.792179               | -2.391316 | 0.423981  |
| 34            | 1             | 0           | -2.648679               | -1.991039 | 1.615257  |
| 35            | 1             | 0           | -2.917789               | -0.694483 | 0.416610  |
| 36            | 1             | 0           | -2.231269               | -5.407233 | -0.432634 |
| 37            | 1             | 0           | -2.456260               | -4.138069 | -1.657963 |
| 38            | 1             | 0           | -1.064463               | -3.807335 | 1.068696  |
| 39            | 1             | 0           | -0.274950               | -3.814914 | -0.537931 |
| 40            | 1             | 0           | -3.960699               | -2.347255 | -1.147395 |
| 41            | 7             | 0           | -1.449134               | -2.109268 | -0.100624 |
| 42            | 1             | 0           | -1.521387               | -1.806147 | -1.087434 |
| 43            | 16            | 0           | -0.252296               | -0.525781 | 1.815427  |
| 44            | 8             | 0           | -3.582585               | -3.981265 | 0.072163  |

Total Energy (a.u.) = -1634.05230170; NIMAG = i189.87

**Table S23.** Cartesian coordinates, energy (u.a.) and number of imaginary frequencies (NIMAG) for Transition State (TS1) associated to the nucleophilic attack of piperidine to compound **7** in acetonitrile, calculated using M06-2X/6-31G++(d,p) level theory.

| Center Number | Atomic Number | Atomic Type | Coordinates (Angstroms) |           |           |
|---------------|---------------|-------------|-------------------------|-----------|-----------|
|               |               |             | X                       | Y         | Z         |
| 1             | 6             | 0           | -3.250610               | -1.931469 | -0.216978 |
| 2             | 6             | 0           | -1.918785               | -1.637359 | 0.030299  |
| 3             | 6             | 0           | -1.527088               | -0.311390 | 0.207694  |
| 4             | 6             | 0           | -2.438521               | 0.739317  | 0.126429  |
| 5             | 6             | 0           | -3.774265               | 0.445868  | -0.116021 |
| 6             | 6             | 0           | -4.155618               | -0.879112 | -0.280099 |
| 7             | 1             | 0           | -3.587609               | -2.950359 | -0.357040 |
| 8             | 1             | 0           | -1.171703               | -2.420886 | 0.084054  |
| 9             | 1             | 0           | -2.115700               | 1.762134  | 0.253142  |
| 10            | 1             | 0           | -4.513175               | 1.233627  | -0.187213 |
| 11            | 7             | 0           | -5.565987               | -1.177809 | -0.539217 |
| 12            | 8             | 0           | -6.351363               | -0.245849 | -0.568869 |
| 13            | 8             | 0           | -5.880158               | -2.343051 | -0.711699 |
| 14            | 8             | 0           | -0.165746               | -0.142940 | 0.370415  |
| 15            | 6             | 0           | 0.427502                | 0.650739  | 1.287468  |
| 16            | 8             | 0           | 1.656991                | 0.175379  | 1.599719  |
| 17            | 6             | 0           | 2.219823                | -0.890402 | 0.909286  |
| 18            | 6             | 0           | 1.719747                | -2.177787 | 1.090093  |
| 19            | 6             | 0           | 3.345245                | -0.643592 | 0.133278  |
| 20            | 6             | 0           | 2.343999                | -3.238857 | 0.453105  |
| 21            | 1             | 0           | 0.858049                | -2.337199 | 1.728727  |
| 22            | 6             | 0           | 3.974136                | -1.707091 | -0.503616 |
| 23            | 1             | 0           | 3.733018                | 0.365305  | 0.042475  |
| 24            | 6             | 0           | 3.468685                | -3.000723 | -0.347922 |
| 25            | 1             | 0           | 1.969095                | -4.248306 | 0.576830  |
| 26            | 1             | 0           | 4.852671                | -1.535329 | -1.114842 |
| 27            | 6             | 0           | 4.117272                | -4.101305 | -1.009874 |
| 28            | 7             | 0           | 4.639826                | -4.985207 | -1.544083 |
| 29            | 6             | 0           | 2.147560                | 2.958268  | 0.377536  |
| 30            | 6             | 0           | 2.754840                | 3.957776  | -0.608010 |
| 31            | 6             | 0           | 0.741033                | 3.634827  | -2.072873 |
| 32            | 6             | 0           | 0.199740                | 2.641522  | -1.043088 |
| 33            | 1             | 0           | 3.368379                | 4.680960  | -0.061695 |
| 34            | 1             | 0           | 1.538727                | 3.486160  | 1.123648  |
| 35            | 1             | 0           | 2.919248                | 2.405738  | 0.922399  |
| 36            | 1             | 0           | -0.095721               | 4.124677  | -2.580430 |
| 37            | 1             | 0           | 1.306803                | 3.084343  | -2.835585 |
| 38            | 1             | 0           | -0.437287               | 3.169848  | -0.319160 |
| 39            | 1             | 0           | -0.400809               | 1.863911  | -1.525030 |
| 40            | 1             | 0           | 3.419992                | 3.422832  | -1.298701 |
| 41            | 7             | 0           | 1.258256                | 1.990065  | -0.268624 |
| 42            | 1             | 0           | 1.791916                | 1.372867  | -0.881981 |
| 43            | 6             | 0           | 1.650394                | 4.662377  | -1.398115 |
| 44            | 1             | 0           | 2.081103                | 5.340417  | -2.140770 |
| 45            | 1             | 0           | 1.052312                | 5.275394  | -0.710802 |
| 46            | 16            | 0           | -0.327644               | 1.658536  | 2.382335  |

Total Energy (a.u.) = -1598.1806269; NIMAG = i176.33

**Table S24.** Cartesian coordinates, energy (u.a.) and number of imaginary frequencies (NIMAG) for concerted Transition State (CTS) associated to the departure of 4-nitrophenol for the reaction of compound **7** with piperidine, calculated using M06-2X/6-31G++(d,p) level theory

| Center<br>Number | Atomic<br>Number | Atomic<br>Type | Coordinates (Angstroms) |           |           |
|------------------|------------------|----------------|-------------------------|-----------|-----------|
|                  |                  |                | X                       | Y         | Z         |
| 1                | 6                | 0              | -3.769037               | -0.984734 | -0.767474 |
| 2                | 6                | 0              | -2.759232               | -0.118658 | -1.124409 |
| 3                | 6                | 0              | -1.393678               | -0.392912 | -0.810402 |
| 4                | 6                | 0              | -1.116391               | -1.596482 | -0.097435 |
| 5                | 6                | 0              | -2.128443               | -2.461939 | 0.266716  |
| 6                | 8                | 0              | -0.454803               | 0.427256  | -1.151471 |
| 7                | 6                | 0              | -3.449388               | -2.154123 | -0.067995 |
| 8                | 1                | 0              | -4.803290               | -0.776742 | -1.014386 |
| 9                | 1                | 0              | -2.980681               | 0.793252  | -1.671154 |
| 10               | 1                | 0              | -0.084689               | -1.828387 | 0.143781  |
| 11               | 1                | 0              | -1.916345               | -3.378894 | 0.803526  |
| 12               | 7                | 0              | -4.502971               | -3.060396 | 0.309464  |
| 13               | 8                | 0              | -5.657182               | -2.778443 | 0.003781  |
| 14               | 8                | 0              | -4.208933               | -4.080607 | 0.923925  |
| 15               | 6                | 0              | 0.754297                | 1.314307  | 0.378713  |
| 16               | 6                | 0              | 2.632774                | 0.063944  | -0.272162 |
| 17               | 6                | 0              | 3.101196                | -2.153129 | -1.019110 |
| 18               | 6                | 0              | 2.292206                | -1.025517 | -1.063916 |
| 19               | 6                | 0              | 3.748917                | 0.078266  | 0.552304  |
| 20               | 1                | 0              | 1.405530                | -0.965975 | -1.684409 |
| 21               | 6                | 0              | 4.557867                | -1.049840 | 0.592810  |
| 22               | 1                | 0              | 3.974075                | 0.957717  | 1.144356  |
| 23               | 6                | 0              | 4.229888                | -2.162342 | -0.190795 |
| 24               | 1                | 0              | 5.437750                | -1.070946 | 1.225110  |
| 25               | 1                | 0              | 2.864335                | -3.021120 | -1.623601 |
| 26               | 6                | 0              | 5.068509                | -3.331350 | -0.150024 |
| 27               | 7                | 0              | 5.741782                | -4.272342 | -0.118607 |
| 28               | 6                | 0              | -1.269731               | 2.796868  | 0.507953  |
| 29               | 6                | 0              | -1.915382               | 4.000870  | -0.161020 |
| 30               | 6                | 0              | 0.353735                | 5.016384  | -0.483818 |
| 31               | 6                | 0              | 0.984962                | 3.790124  | 0.160487  |
| 32               | 1                | 0              | 0.346949                | 4.884348  | -1.572181 |
| 33               | 1                | 0              | 1.001362                | 5.870085  | -0.268780 |
| 34               | 1                | 0              | 1.072648                | 3.890857  | 1.245689  |
| 35               | 1                | 0              | 1.960492                | 3.559802  | -0.264292 |
| 36               | 1                | 0              | -2.908225               | 4.128317  | 0.277168  |
| 37               | 1                | 0              | -2.060915               | 3.793071  | -1.228366 |
| 38               | 1                | 0              | -1.132680               | 2.951668  | 1.579783  |
| 39               | 1                | 0              | -1.826625               | 1.875032  | 0.346286  |
| 40               | 8                | 0              | 1.859029                | 1.216983  | -0.369687 |
| 41               | 7                | 0              | 0.102241                | 2.582657  | -0.070111 |
| 42               | 1                | 0              | -0.025220               | 2.419320  | -1.080308 |
| 43               | 16               | 0              | 0.461800                | 0.621687  | 1.830385  |
| 44               | 6                | 0              | -1.065910               | 5.257286  | 0.027118  |
| 45               | 1                | 0              | -1.516087               | 6.102112  | -0.499278 |
| 46               | 1                | 0              | -1.032383               | 5.516407  | 1.092035  |

Total Energy (a.u.) = -1598.17528934; NIMAG = i209.48

**Table S25.** Cartesian coordinates, energy (u.a.) and number of imaginary frequencies (NIMAG) for concerted Transition State (CTS) associated to the departure of 4-cyanophenol for the reaction of compound **7** with piperidine, calculated using M06-2X/6-31G++(d,p) level theory

| Center Number | Atomic Number | Atomic Type | Coordinates (Angstroms) |           |           |
|---------------|---------------|-------------|-------------------------|-----------|-----------|
|               |               |             | X                       | Y         | Z         |
| 1             | 6             | 0           | 1.876209                | -2.976200 | -0.622677 |
| 2             | 6             | 0           | 0.603233                | -2.425033 | -0.675038 |
| 3             | 6             | 0           | 0.403692                | -1.138701 | -0.188360 |
| 4             | 6             | 0           | 1.433127                | -0.372040 | 0.348626  |
| 5             | 6             | 0           | 2.705737                | -0.924117 | 0.403116  |
| 6             | 8             | 0           | -0.888167               | -0.645698 | -0.351910 |
| 7             | 6             | 0           | 2.901117                | -2.212134 | -0.080947 |
| 8             | 1             | 0           | 2.074228                | -3.974441 | -0.990538 |
| 9             | 1             | 0           | -0.233215               | -2.976223 | -1.088592 |
| 10            | 1             | 0           | 1.247615                | 0.632479  | 0.708195  |
| 11            | 1             | 0           | 3.538699                | -0.363971 | 0.808949  |
| 12            | 7             | 0           | 4.248184                | -2.788614 | -0.020805 |
| 13            | 8             | 0           | 5.135331                | -2.115292 | 0.473889  |
| 14            | 8             | 0           | 4.408221                | -3.911094 | -0.468049 |
| 15            | 6             | 0           | -1.616521               | -0.179641 | 0.656434  |
| 16            | 6             | 0           | -0.575927               | 2.357753  | -0.160710 |
| 17            | 6             | 0           | 1.423297                | 3.310558  | 0.886891  |
| 18            | 6             | 0           | 0.089413                | 2.951770  | 0.953201  |
| 19            | 6             | 0           | 0.187209                | 2.189623  | -1.355460 |
| 20            | 1             | 0           | -0.482910               | 3.111554  | 1.861198  |
| 21            | 6             | 0           | 1.516441                | 2.550724  | -1.419886 |
| 22            | 1             | 0           | -0.306020               | 1.747589  | -2.216128 |
| 23            | 6             | 0           | 2.156265                | 3.103166  | -0.294181 |
| 24            | 1             | 0           | 2.082663                | 2.398972  | -2.333921 |
| 25            | 1             | 0           | 1.915675                | 3.748924  | 1.749797  |
| 26            | 6             | 0           | 3.539512                | 3.461448  | -0.353618 |
| 27            | 7             | 0           | 4.662858                | 3.750170  | -0.398492 |
| 28            | 6             | 0           | -3.263583               | -0.220452 | -1.276518 |
| 29            | 6             | 0           | -4.738544               | -0.017871 | -1.585641 |
| 30            | 6             | 0           | -5.335268               | -1.086199 | 0.594359  |
| 31            | 6             | 0           | -3.856842               | -1.251186 | 0.912782  |
| 32            | 1             | 0           | -5.694794               | -0.151493 | 1.041129  |
| 33            | 1             | 0           | -5.867386               | -1.902326 | 1.089699  |
| 34            | 1             | 0           | -3.457208               | -2.201952 | 0.548610  |
| 35            | 1             | 0           | -3.657108               | -1.159580 | 1.978876  |
| 36            | 1             | 0           | -4.851033               | -0.050156 | -2.672383 |
| 37            | 1             | 0           | -5.046244               | 0.983963  | -1.261800 |
| 38            | 1             | 0           | -2.915609               | -1.200956 | -1.606490 |
| 39            | 1             | 0           | -2.632007               | 0.563444  | -1.686940 |
| 40            | 8             | 0           | -1.789595               | 1.937309  | -0.075635 |
| 41            | 7             | 0           | -3.051286               | -0.171263 | 0.222621  |
| 42            | 1             | 0           | -3.365226               | 0.757722  | 0.536262  |
| 43            | 16            | 0           | -1.211707               | -0.054458 | 2.232820  |
| 44            | 6             | 0           | -5.598254               | -1.084155 | -0.910125 |
| 45            | 1             | 0           | -6.657198               | -0.901836 | -1.107231 |
| 46            | 1             | 0           | -5.352113               | -2.068117 | -1.326928 |

Total Energy (a.u.) = -1598.16794899; NIMAG = i193.21

**Table S26.** Cartesian coordinates, energy (u.a.) for the intermediate structure (T±) associated to the reaction of compound 7 with piperidine in acetonitrile, calculated using M06-2X/6-31G++(d,p) level theory

| Center Number | Atomic Number | Atomic Type | Coordinates (Angstroms) |           |           |
|---------------|---------------|-------------|-------------------------|-----------|-----------|
|               |               |             | X                       | Y         | Z         |
| 1             | 6             | 0           | 3.387429                | 0.094364  | -0.912545 |
| 2             | 6             | 0           | 2.012318                | 0.219877  | -1.032712 |
| 3             | 6             | 0           | 3.889450                | -0.961684 | -0.161779 |
| 4             | 1             | 0           | 4.062924                | 0.798326  | -1.381313 |
| 5             | 6             | 0           | 1.168600                | -0.705311 | -0.413946 |
| 6             | 1             | 0           | 1.569997                | 1.029625  | -1.602071 |
| 7             | 6             | 0           | 3.065452                | -1.893601 | 0.457246  |
| 8             | 7             | 0           | 5.338662                | -1.100400 | -0.022678 |
| 9             | 6             | 0           | 1.689456                | -1.769773 | 0.325577  |
| 10            | 1             | 0           | 3.500719                | -2.706386 | 1.024604  |
| 11            | 8             | 0           | 5.763576                | -2.003509 | 0.678660  |
| 12            | 8             | 0           | 6.049234                | -0.305444 | -0.615372 |
| 13            | 1             | 0           | 1.031216                | -2.481879 | 0.803127  |
| 14            | 1             | 0           | -2.327345               | -1.364845 | -1.242716 |
| 15            | 7             | 0           | -2.149567               | -1.662583 | -0.274934 |
| 16            | 6             | 0           | -1.491257               | -3.007843 | -0.319035 |
| 17            | 6             | 0           | -3.472547               | -1.732603 | 0.436374  |
| 18            | 6             | 0           | -4.395404               | -2.723011 | -0.260637 |
| 19            | 1             | 0           | -3.879663               | -0.722864 | 0.449649  |
| 20            | 1             | 0           | 0.389116                | 1.501864  | 0.835207  |
| 21            | 6             | 0           | -2.394518               | -4.020125 | -1.012597 |
| 22            | 1             | 0           | -3.439246               | 2.475317  | -0.853197 |
| 23            | 1             | 0           | -5.334520               | -2.748302 | 0.298004  |
| 24            | 1             | 0           | -4.631971               | -2.359972 | -1.268430 |
| 25            | 1             | 0           | -3.239727               | -2.038338 | 1.458247  |
| 26            | 8             | 0           | -0.166503               | -0.543505 | -0.683212 |
| 27            | 1             | 0           | -1.880680               | -4.984656 | -0.998127 |
| 28            | 1             | 0           | -1.295139               | -3.277698 | 0.722165  |
| 29            | 1             | 0           | -0.547708               | -2.888594 | -0.851076 |
| 30            | 6             | 0           | 0.035170                | 3.578407  | 0.439654  |
| 31            | 6             | 0           | -1.563486               | 1.848796  | -0.028775 |
| 32            | 6             | 0           | -2.128974               | 4.146176  | -0.493549 |
| 33            | 8             | 0           | -2.020834               | 0.567624  | -0.098150 |
| 34            | 6             | 0           | -2.472038               | 2.806489  | -0.492936 |
| 35            | 6             | 0           | -0.866995               | 4.538492  | -0.027359 |
| 36            | 1             | 0           | -2.514252               | -3.737093 | -2.065557 |
| 37            | 6             | 0           | -1.212488               | -0.535471 | 0.279891  |
| 38            | 6             | 0           | -0.306205               | 2.232029  | 0.444721  |
| 39            | 1             | 0           | 1.009279                | 3.885734  | 0.803830  |
| 40            | 6             | 0           | -0.500490               | 5.927268  | -0.028014 |
| 41            | 1             | 0           | -2.830573               | 4.889094  | -0.855813 |
| 42            | 7             | 0           | -0.205078               | 7.047309  | -0.029211 |
| 43            | 6             | 0           | -3.760178               | -4.110219 | -0.335270 |
| 44            | 1             | 0           | -4.409085               | -4.796877 | -0.884312 |
| 45            | 1             | 0           | -3.640670               | -4.512334 | 0.677876  |
| 46            | 16            | 0           | -0.849021               | -0.704079 | 1.986026  |

Total Energy (a.u.) = -1598.20030489;



**Table S27.** Cartesian coordinates, energy (u.a.) and number of imaginary frequencies (NIMAG) for Transition State (TS2) associated to the departure of 4-nitrophenol from the reaction of compound **7** with piperidine in acetonitrile, calculated using M06-2X/6-31G++(d,p) level theory

| Center Number | Atomic Number | Atomic Type | Coordinates (Angstroms) |           |           |
|---------------|---------------|-------------|-------------------------|-----------|-----------|
|               |               |             | X                       | Y         | Z         |
| 1             | 6             | 0           | -3.770347               | -0.983325 | -0.767574 |
| 2             | 6             | 0           | -2.760239               | -0.117616 | -1.124519 |
| 3             | 6             | 0           | -1.394752               | -0.392289 | -0.810507 |
| 4             | 6             | 0           | -1.117897               | -1.595983 | -0.097565 |
| 5             | 6             | 0           | -2.130257               | -2.461064 | 0.266614  |
| 6             | 6             | 0           | -3.451104               | -2.152814 | -0.068053 |
| 7             | 1             | 0           | -4.804521               | -0.774947 | -1.014466 |
| 8             | 1             | 0           | -2.981366               | 0.794443  | -1.671131 |
| 9             | 1             | 0           | -0.086312               | -1.828343 | 0.143695  |
| 10            | 1             | 0           | -1.918461               | -3.378091 | 0.803431  |
| 11            | 7             | 0           | -4.504924               | -3.058743 | 0.309550  |
| 12            | 8             | 0           | -4.211110               | -4.078747 | 0.924454  |
| 13            | 8             | 0           | -5.659080               | -2.776754 | 0.003674  |
| 14            | 8             | 0           | -0.455642               | 0.427617  | -1.151514 |
| 15            | 6             | 0           | 0.754970                | 1.313618  | 0.378168  |
| 16            | 8             | 0           | 1.859191                | 1.215890  | -0.370897 |
| 17            | 6             | 0           | 2.633124                | 0.062990  | -0.272907 |
| 18            | 6             | 0           | 3.750903                | 0.078796  | 0.549324  |
| 19            | 6             | 0           | 2.291073                | -1.027941 | -1.062030 |
| 20            | 6             | 0           | 4.559917                | -1.049253 | 0.590395  |
| 21            | 1             | 0           | 3.977220                | 0.959351  | 1.139260  |
| 22            | 6             | 0           | 3.100144                | -2.155447 | -1.016707 |
| 23            | 1             | 0           | 1.403300                | -0.969780 | -1.681059 |
| 24            | 6             | 0           | 4.230433                | -2.163188 | -0.190527 |
| 25            | 1             | 0           | 5.440999                | -1.069191 | 1.221057  |
| 26            | 1             | 0           | 2.862126                | -3.024498 | -1.619209 |
| 27            | 6             | 0           | 5.069127                | -3.332127 | -0.149310 |
| 28            | 7             | 0           | 5.742382                | -4.273124 | -0.117656 |
| 29            | 16            | 0           | 0.463028                | 0.620872  | 1.829868  |
| 30            | 6             | 0           | 0.986064                | 3.789549  | 0.160773  |
| 31            | 6             | 0           | 0.355095                | 5.016142  | -0.483234 |
| 32            | 6             | 0           | -1.914079               | 4.001117  | -0.160340 |
| 33            | 6             | 0           | -1.268705               | 2.796672  | 0.508127  |
| 34            | 1             | 0           | 1.003051                | 5.869574  | -0.268122 |
| 35            | 1             | 0           | 1.073493                | 3.890250  | 1.246006  |
| 36            | 1             | 0           | 1.961599                | 3.559169  | -0.263972 |
| 37            | 1             | 0           | -2.906979               | 4.128553  | 0.277716  |
| 38            | 1             | 0           | -2.059477               | 3.793631  | -1.227759 |
| 39            | 1             | 0           | -1.131571               | 2.950890  | 1.580022  |
| 40            | 1             | 0           | -1.825994               | 1.875200  | 0.345857  |
| 41            | 1             | 0           | 0.348036                | 4.884348  | -1.571624 |
| 42            | 7             | 0           | 0.103161                | 2.582321  | -0.070164 |
| 43            | 1             | 0           | -0.024530               | 2.419362  | -1.080439 |
| 44            | 6             | 0           | -1.064357               | 5.257258  | 0.028136  |
| 45            | 1             | 0           | -1.514487               | 6.102424  | -0.497756 |
| 46            | 1             | 0           | -1.030446               | 5.515902  | 1.093162  |

Total Energy (a.u.) = -1598.17528906; NIMAG=i209.27

**Table S28.** Cartesian coordinates, energy (u.a.) and number of imaginary frequencies (NIMAG) for concerted Transition State (TS2) associated to the departure of 4-cyanophenol for the reaction of compound **7** with piperidine in acetonitrile, calculated using M06-2X/6-31G++(d,p) level theory

| Center Number | Atomic Number | Atomic Type | Coordinates (Angstroms) |           |           |
|---------------|---------------|-------------|-------------------------|-----------|-----------|
|               |               |             | X                       | Y         | Z         |
| 1             | 6             | 0           | 4.161248                | -1.002047 | 0.552041  |
| 2             | 6             | 0           | 2.921209                | -1.623896 | 0.489809  |
| 3             | 6             | 0           | 1.922848                | -1.037545 | -0.275776 |
| 4             | 6             | 0           | 2.106369                | 0.140783  | -0.989704 |
| 5             | 6             | 0           | 3.344685                | 0.765569  | -0.924850 |
| 6             | 6             | 0           | 4.343090                | 0.180727  | -0.154207 |
| 7             | 1             | 0           | 4.973557                | -1.417502 | 1.134195  |
| 8             | 1             | 0           | 2.723266                | -2.546831 | 1.021992  |
| 9             | 1             | 0           | 1.277379                | 0.534345  | -1.567239 |
| 10            | 1             | 0           | 3.542723                | 1.685102  | -1.460584 |
| 11            | 7             | 0           | 5.652325                | 0.839907  | -0.087357 |
| 12            | 8             | 0           | 5.796747                | 1.885146  | -0.697076 |
| 13            | 8             | 0           | 6.525607                | 0.307319  | 0.575257  |
| 14            | 8             | 0           | 0.704156                | -1.697032 | -0.389644 |
| 15            | 6             | 0           | -0.315122               | -1.297852 | 0.378723  |
| 16            | 8             | 0           | -1.007746               | 0.084987  | -1.166555 |
| 17            | 6             | 0           | -1.526223               | 1.211175  | -0.792154 |
| 18            | 6             | 0           | -2.885549               | 1.532485  | -1.078059 |
| 19            | 6             | 0           | -0.772896               | 2.174917  | -0.063221 |
| 20            | 6             | 0           | -3.443836               | 2.729621  | -0.680373 |
| 21            | 1             | 0           | -3.471442               | 0.807347  | -1.636196 |
| 22            | 6             | 0           | -1.336247               | 3.371556  | 0.339086  |
| 23            | 1             | 0           | 0.264592                | 1.953205  | 0.164519  |
| 24            | 6             | 0           | -2.675862               | 3.664389  | 0.037002  |
| 25            | 1             | 0           | -4.478959               | 2.956727  | -0.916562 |
| 26            | 1             | 0           | -0.743863               | 4.095588  | 0.890286  |
| 27            | 6             | 0           | -3.254419               | 4.904014  | 0.454304  |
| 28            | 7             | 0           | -3.723991               | 5.909423  | 0.794454  |
| 29            | 6             | 0           | -2.786311               | -1.693359 | 0.542951  |
| 30            | 6             | 0           | -3.928423               | -2.435675 | -0.133649 |
| 31            | 6             | 0           | -2.389516               | -4.360300 | -0.585969 |
| 32            | 6             | 0           | -1.247279               | -3.591684 | 0.063065  |
| 33            | 1             | 0           | -4.858449               | -2.112479 | 0.340433  |
| 34            | 1             | 0           | -2.711237               | -1.941805 | 1.603349  |
| 35            | 1             | 0           | -2.861673               | -0.612250 | 0.431910  |
| 36            | 1             | 0           | -2.200035               | -5.424879 | -0.426969 |
| 37            | 1             | 0           | -2.366536               | -4.187913 | -1.668481 |
| 38            | 1             | 0           | -1.183132               | -3.775943 | 1.139042  |
| 39            | 1             | 0           | -0.288550               | -3.812399 | -0.402605 |
| 40            | 1             | 0           | -3.985766               | -2.138664 | -1.188365 |
| 41            | 7             | 0           | -1.482965               | -2.104135 | -0.085078 |
| 42            | 1             | 0           | -1.542269               | -1.836404 | -1.080868 |
| 43            | 6             | 0           | -3.746064               | -3.948394 | -0.016283 |
| 44            | 1             | 0           | -4.548347               | -4.470357 | -0.542729 |
| 45            | 1             | 0           | -3.803685               | -4.240009 | 1.039253  |
| 46            | 16            | 0           | -0.247218               | -0.548845 | 1.826201  |

Total Energy (a.u.) = -1598.17227063; NIMAG=i186.54

**Table S29.** Cartesian coordinates, energy (u.a.) and number of imaginary frequencies (NIMAG) for Transition State (TS1) associated to the nucleophilic attack of morpholine to compound **9** in acetonitrile, calculated using M06-2X/6-31G++(d,p) level theory

| Center Number | Atomic Number | Atomic Type | Coordinates (Angstroms) |           |           |
|---------------|---------------|-------------|-------------------------|-----------|-----------|
|               |               |             | X                       | Y         | Z         |
| 1             | 6             | 0           | -2.269613               | -2.667624 | -0.938076 |
| 2             | 6             | 0           | -1.188207               | -1.805617 | -1.005131 |
| 3             | 6             | 0           | -1.178184               | -0.642761 | -0.232284 |
| 4             | 6             | 0           | -2.242385               | -0.317732 | 0.609829  |
| 5             | 6             | 0           | -3.325578               | -1.185223 | 0.679653  |
| 6             | 6             | 0           | -3.322058               | -2.340383 | -0.090229 |
| 7             | 1             | 0           | -2.301919               | -3.577493 | -1.523206 |
| 8             | 1             | 0           | -0.339137               | -2.017798 | -1.644383 |
| 9             | 1             | 0           | -2.224677               | 0.582933  | 1.205045  |
| 10            | 1             | 0           | -4.168826               | -0.967068 | 1.322510  |
| 11            | 7             | 0           | -4.467443               | -3.246482 | -0.006109 |
| 12            | 8             | 0           | -5.385561               | -2.942543 | 0.736739  |
| 13            | 8             | 0           | -4.444959               | -4.260392 | -0.683428 |
| 14            | 8             | 0           | -0.061722               | 0.141160  | -0.425051 |
| 15            | 6             | 0           | 0.456114                | 0.918648  | 0.567077  |
| 16            | 8             | 0           | 1.777750                | 1.167805  | 0.267204  |
| 17            | 6             | 0           | 2.616837                | 0.082366  | 0.192333  |
| 18            | 6             | 0           | 2.316719                | -1.145094 | 0.784102  |
| 19            | 6             | 0           | 3.820028                | 0.287957  | -0.480986 |
| 20            | 6             | 0           | 3.232557                | -2.182723 | 0.686520  |
| 21            | 1             | 0           | 1.388825                | -1.288932 | 1.327593  |
| 22            | 6             | 0           | 4.736124                | -0.747207 | -0.569438 |
| 23            | 1             | 0           | 4.016669                | 1.256492  | -0.925847 |
| 24            | 6             | 0           | 4.441665                | -1.987513 | 0.010792  |
| 25            | 1             | 0           | 3.014228                | -3.142832 | 1.140183  |
| 26            | 1             | 0           | 5.676021                | -0.601401 | -1.089601 |
| 27            | 6             | 0           | 5.388058                | -3.064479 | -0.087259 |
| 28            | 7             | 0           | 6.151773                | -3.931162 | -0.168122 |
| 29            | 6             | 0           | 0.618880                | 3.917708  | 0.278609  |
| 30            | 6             | 0           | 0.111970                | 5.298913  | -0.117922 |
| 31            | 6             | 0           | -1.964074               | 4.424638  | -0.745374 |
| 32            | 6             | 0           | -1.523547               | 3.015111  | -0.364858 |
| 33            | 1             | 0           | 0.557176                | 6.074029  | 0.510768  |
| 34            | 1             | 0           | 0.429688                | 3.749357  | 1.346190  |
| 35            | 1             | 0           | 1.693617                | 3.829025  | 0.101920  |
| 36            | 1             | 0           | -3.035015               | 4.558999  | -0.575068 |
| 37            | 1             | 0           | -1.751160               | 4.605929  | -1.811170 |
| 38            | 1             | 0           | -1.805074               | 2.821970  | 0.678547  |
| 39            | 1             | 0           | -2.009113               | 2.269316  | -1.001940 |
| 40            | 1             | 0           | 0.374944                | 5.504019  | -1.168179 |
| 41            | 7             | 0           | -0.072601               | 2.852332  | -0.450907 |
| 42            | 1             | 0           | 0.226751                | 2.836568  | -1.424627 |
| 43            | 8             | 0           | -1.293617               | 5.386472  | 0.050998  |
| 44            | 8             | 0           | -0.014008               | 1.086266  | 1.658924  |

Total Energy (a.u.) = -1311.13339693; NIMAG = i128.08

**Table S30.** Cartesian coordinates, energy (u.a.) and number of imaginary frequencies (NIMAG) for concerted Transition State (CTS) associated to the departure of 4-nitrophenol for the reaction of compound **9** with morpholine in acetonitrile, calculated using M06-2X/6-31G++(d,p) level theory

| Center Number | Atomic Number | Atomic Type | Coordinates (Angstroms) |           |           |
|---------------|---------------|-------------|-------------------------|-----------|-----------|
|               |               |             | X                       | Y         | Z         |
| 1             | 6             | 0           | 3.681455                | -1.091380 | 0.854543  |
| 2             | 6             | 0           | 2.697208                | -0.203404 | 1.228408  |
| 3             | 6             | 0           | 1.351580                | -0.345269 | 0.774882  |
| 4             | 6             | 0           | 1.067862                | -1.437139 | -0.098905 |
| 5             | 6             | 0           | 2.053939                | -2.323070 | -0.477149 |
| 6             | 8             | 0           | 0.437231                | 0.489288  | 1.147535  |
| 7             | 6             | 0           | 3.357374                | -2.151798 | 0.000919  |
| 8             | 1             | 0           | 4.700383                | -0.982949 | 1.206584  |
| 9             | 1             | 0           | 2.922707                | 0.628099  | 1.888906  |
| 10            | 1             | 0           | 0.052893                | -1.555201 | -0.462249 |
| 11            | 1             | 0           | 1.837365                | -3.155418 | -1.136472 |
| 12            | 7             | 0           | 4.381244                | -3.081732 | -0.390151 |
| 13            | 8             | 0           | 5.518936                | -2.920409 | 0.042054  |
| 14            | 8             | 0           | 4.083050                | -4.005283 | -1.141850 |
| 15            | 6             | 0           | -0.773116               | 1.358369  | -0.342719 |
| 16            | 6             | 0           | -2.638035               | 0.113760  | 0.246332  |
| 17            | 6             | 0           | -3.083996               | -2.123086 | 0.949066  |
| 18            | 6             | 0           | -2.311383               | -0.973894 | 1.047078  |
| 19            | 6             | 0           | -3.700236               | 0.099612  | -0.646207 |
| 20            | 1             | 0           | -1.459850               | -0.898289 | 1.713485  |
| 21            | 6             | 0           | -4.474055               | -1.049831 | -0.739919 |
| 22            | 1             | 0           | -3.915213               | 0.976361  | -1.246042 |
| 23            | 6             | 0           | -4.162947               | -2.157020 | 0.057611  |
| 24            | 1             | 0           | -5.313741               | -1.091842 | -1.423851 |
| 25            | 1             | 0           | -2.856779               | -2.989671 | 1.559251  |
| 26            | 6             | 0           | -4.967779               | -3.346673 | -0.035694 |
| 27            | 7             | 0           | -5.615678               | -4.303132 | -0.107993 |
| 28            | 6             | 0           | 1.205635                | 2.800727  | -0.679183 |
| 29            | 6             | 0           | 1.866437                | 4.095002  | -0.235206 |
| 30            | 6             | 0           | -0.171705               | 5.086144  | 0.291516  |
| 31            | 6             | 0           | -0.961631               | 3.849642  | -0.110438 |
| 32            | 1             | 0           | 0.055503                | 5.053401  | 1.367256  |
| 33            | 1             | 0           | -0.776983               | 5.971198  | 0.091143  |
| 34            | 1             | 0           | -1.240620               | 3.884784  | -1.165649 |
| 35            | 1             | 0           | -1.847520               | 3.716853  | 0.509019  |
| 36            | 1             | 0           | 2.772297                | 4.250633  | -0.822609 |
| 37            | 1             | 0           | 2.145725                | 4.035185  | 0.827411  |
| 38            | 1             | 0           | 0.955859                | 2.822465  | -1.740218 |
| 39            | 1             | 0           | 1.821544                | 1.928164  | -0.459201 |
| 40            | 8             | 0           | -1.896379               | 1.285924  | 0.390106  |
| 41            | 7             | 0           | -0.085997               | 2.637513  | 0.064176  |
| 42            | 1             | 0           | 0.138033                | 2.475758  | 1.057476  |
| 43            | 8             | 0           | -0.530384               | 0.819017  | -1.381042 |
| 44            | 8             | 0           | 1.016519                | 5.201185  | -0.461314 |

Total Energy (a.u.) = -1311.12384833; NIMAG = i128.08

**Table S31.** Cartesian coordinates, energy (u.a.) and number of imaginary frequencies (NIMAG) for concerted Transition State (CTS) associated to the departure of 4-cyanophenol for the reaction of compound **9** with morpholine in acetonitrile, calculated using M06-2X/6-31G++(d,p) level theory

| Center Number | Atomic Number | Atomic Type | Coordinates (Angstroms) |           |           |
|---------------|---------------|-------------|-------------------------|-----------|-----------|
|               |               |             | X                       | Y         | Z         |
| 1             | 6             | 0           | -4.070118               | -1.117301 | -0.657129 |
| 2             | 6             | 0           | -2.827070               | -1.727461 | -0.549723 |
| 3             | 6             | 0           | -1.866229               | -1.141077 | 0.262411  |
| 4             | 6             | 0           | -2.089044               | 0.033039  | 0.972843  |
| 5             | 6             | 0           | -3.329671               | 0.647007  | 0.862426  |
| 6             | 6             | 0           | -4.291983               | 0.057539  | 0.050628  |
| 7             | 1             | 0           | -4.853372               | -1.535544 | -1.275913 |
| 8             | 1             | 0           | -2.600085               | -2.644393 | -1.080551 |
| 9             | 1             | 0           | -1.287141               | 0.436798  | 1.580891  |
| 10            | 1             | 0           | -3.556195               | 1.562163  | 1.394105  |
| 11            | 7             | 0           | -5.604088               | 0.704683  | -0.062598 |
| 12            | 8             | 0           | -5.785295               | 1.739380  | 0.555153  |
| 13            | 8             | 0           | -6.442975               | 0.173351  | -0.769163 |
| 14            | 8             | 0           | -0.641569               | -1.788156 | 0.412420  |
| 15            | 6             | 0           | 0.365885                | -1.310517 | -0.334403 |
| 16            | 8             | 0           | 1.025113                | 0.059359  | 1.181577  |
| 17            | 6             | 0           | 1.481914                | 1.201067  | 0.767986  |
| 18            | 6             | 0           | 2.764210                | 1.671339  | 1.170766  |
| 19            | 6             | 0           | 0.732065                | 2.034176  | -0.110063 |
| 20            | 6             | 0           | 3.253130                | 2.889494  | 0.743051  |
| 21            | 1             | 0           | 3.349451                | 1.042141  | 1.835027  |
| 22            | 6             | 0           | 1.225561                | 3.249844  | -0.540313 |
| 23            | 1             | 0           | -0.241873               | 1.688044  | -0.439984 |
| 24            | 6             | 0           | 2.490070                | 3.696081  | -0.119032 |
| 25            | 1             | 0           | 4.231222                | 3.230626  | 1.068378  |
| 26            | 1             | 0           | 0.636261                | 3.871750  | -1.207451 |
| 27            | 6             | 0           | 2.996809                | 4.955513  | -0.567264 |
| 28            | 7             | 0           | 3.408466                | 5.977157  | -0.933579 |
| 29            | 6             | 0           | 2.783284                | -1.619290 | -0.728160 |
| 30            | 6             | 0           | 4.005772                | -2.396321 | -0.269492 |
| 31            | 6             | 0           | 2.735380                | -4.231788 | 0.387049  |
| 32            | 6             | 0           | 1.428310                | -3.564625 | -0.016142 |
| 33            | 1             | 0           | 4.857385                | -2.117807 | -0.891169 |
| 34            | 1             | 0           | 2.552911                | -1.819580 | -1.775036 |
| 35            | 1             | 0           | 2.895079                | -0.545812 | -0.570499 |
| 36            | 1             | 0           | 2.638763                | -5.309053 | 0.245149  |
| 37            | 1             | 0           | 2.945717                | -4.035932 | 1.448778  |
| 38            | 1             | 0           | 1.174364                | -3.790943 | -1.053944 |
| 39            | 1             | 0           | 0.608859                | -3.849663 | 0.641978  |
| 40            | 1             | 0           | 4.242707                | -2.151496 | 0.776798  |
| 41            | 7             | 0           | 1.598655                | -2.071627 | 0.071667  |
| 42            | 1             | 0           | 1.737142                | -1.755463 | 1.046178  |
| 43            | 8             | 0           | 3.805736                | -3.787410 | -0.418448 |
| 44            | 8             | 0           | 0.303731                | -0.709980 | -1.364512 |

Total Energy (a.u.) = -1311.12062533; NIMAG = i160.40

**Table S32.** Cartesian coordinates, energy (u.a.) for the intermediate structure (T±) associated to the reaction of compound **9** with morpholine in acetonitrile, calculated using M06-2X/6-31G++(d,p) level theory

| Center Number | Atomic Number | Atomic Type | Coordinates (Angstroms) |           |           |
|---------------|---------------|-------------|-------------------------|-----------|-----------|
|               |               |             | X                       | Y         | Z         |
| 1             | 6             | 0           | -3.114667               | -1.181447 | 1.108931  |
| 2             | 6             | 0           | -1.855996               | -0.635688 | 1.291392  |
| 3             | 6             | 0           | -0.790334               | -1.024919 | 0.469724  |
| 4             | 6             | 0           | -0.986613               | -1.965331 | -0.549746 |
| 5             | 6             | 0           | -2.250193               | -2.506671 | -0.740238 |
| 6             | 6             | 0           | -3.292638               | -2.110975 | 0.088789  |
| 7             | 1             | 0           | -3.950689               | -0.894428 | 1.733819  |
| 8             | 1             | 0           | -1.672092               | 0.099096  | 2.066716  |
| 9             | 1             | 0           | -0.166875               | -2.254204 | -1.190833 |
| 10            | 1             | 0           | -2.428955               | -3.237355 | -1.518863 |
| 11            | 7             | 0           | -4.616135               | -2.690006 | -0.115639 |
| 12            | 8             | 0           | -4.757968               | -3.498640 | -1.019112 |
| 13            | 8             | 0           | -5.518454               | -2.338333 | 0.627743  |
| 14            | 8             | 0           | 0.413606                | -0.476349 | 0.788090  |
| 15            | 6             | 0           | 1.369867                | -0.114115 | -0.240927 |
| 16            | 8             | 0           | 1.804441                | 1.198716  | 0.169722  |
| 17            | 6             | 0           | 0.941965                | 2.236515  | 0.028444  |
| 18            | 6             | 0           | -0.314985               | 2.146170  | -0.582077 |
| 19            | 6             | 0           | 1.387310                | 3.456263  | 0.552756  |
| 20            | 6             | 0           | -1.118144               | 3.275998  | -0.651167 |
| 21            | 1             | 0           | -0.649677               | 1.213997  | -1.018336 |
| 22            | 6             | 0           | 0.585809                | 4.580680  | 0.476604  |
| 23            | 1             | 0           | 2.365364                | 3.497257  | 1.018568  |
| 24            | 6             | 0           | -0.677391               | 4.494361  | -0.124406 |
| 25            | 1             | 0           | -2.093597               | 3.212739  | -1.121019 |
| 26            | 1             | 0           | 0.930160                | 5.525126  | 0.883085  |
| 27            | 6             | 0           | -1.517051               | 5.656624  | -0.198419 |
| 28            | 7             | 0           | -2.193511               | 6.595466  | -0.254785 |
| 29            | 6             | 0           | 3.878006                | -0.531947 | -0.491416 |
| 30            | 6             | 0           | 5.070302                | -1.387049 | -0.090582 |
| 31            | 6             | 0           | 3.706474                | -3.146950 | 0.577217  |
| 32            | 6             | 0           | 2.442282                | -2.385137 | 0.207993  |
| 33            | 1             | 0           | 5.916955                | -1.150598 | -0.737076 |
| 34            | 1             | 0           | 3.607452                | -0.694829 | -1.537059 |
| 35            | 1             | 0           | 4.066172                | 0.527589  | -0.321629 |
| 36            | 1             | 0           | 3.540459                | -4.214620 | 0.425487  |
| 37            | 1             | 0           | 3.956255                | -2.978462 | 1.635535  |
| 38            | 1             | 0           | 2.166944                | -2.577486 | -0.831915 |
| 39            | 1             | 0           | 1.612228                | -2.642593 | 0.867415  |
| 40            | 1             | 0           | 5.357031                | -1.175870 | 0.950627  |
| 41            | 8             | 0           | 4.785877                | -2.762492 | -0.249035 |
| 42            | 7             | 0           | 2.675403                | -0.918608 | 0.300598  |
| 43            | 1             | 0           | 2.799872                | -0.645044 | 1.280512  |
| 44            | 8             | 0           | 1.122334                | -0.329973 | -1.429093 |

Total Energy (a.u.) = -1311.14246800;

**Table S33.** Cartesian coordinates, energy (u.a.) and number of imaginary frequencies (NIMAG) for concerted Transition State (TS2) associated to the departure of 4-nitrophenol for the reaction of compound **9** with morpholine, calculated using M06-2X/6-31G++(d,p) level theory

| Center Number | Atomic Number | Atomic Type | Coordinates (Angstroms) |           |           |
|---------------|---------------|-------------|-------------------------|-----------|-----------|
|               |               |             | X                       | Y         | Z         |
| 1             | 6             | 0           | -1.863434               | -2.399186 | -0.466046 |
| 2             | 6             | 0           | -0.501350               | -2.312064 | -0.268162 |
| 3             | 6             | 0           | 0.043514                | -1.476395 | 0.749173  |
| 4             | 6             | 0           | -0.874585               | -0.818464 | 1.620450  |
| 5             | 6             | 0           | -2.233493               | -0.894771 | 1.418970  |
| 6             | 6             | 0           | -2.724173               | -1.673077 | 0.362653  |
| 7             | 1             | 0           | -2.279853               | -3.005488 | -1.261889 |
| 8             | 1             | 0           | 0.188438                | -2.845370 | -0.913051 |
| 9             | 1             | 0           | -0.466023               | -0.198404 | 2.412347  |
| 10            | 1             | 0           | -2.928355               | -0.351439 | 2.048556  |
| 11            | 7             | 0           | -4.139213               | -1.708172 | 0.114911  |
| 12            | 8             | 0           | -4.874074               | -1.004869 | 0.803283  |
| 13            | 8             | 0           | -4.564373               | -2.432727 | -0.780401 |
| 14            | 8             | 0           | 1.318210                | -1.273882 | 0.849267  |
| 15            | 6             | 0           | 1.885483                | -0.041553 | -0.757238 |
| 16            | 8             | 0           | 1.403106                | 1.108145  | -0.265806 |
| 17            | 6             | 0           | 0.061356                | 1.449618  | -0.374749 |
| 18            | 6             | 0           | -0.819510               | 0.902131  | -1.304707 |
| 19            | 6             | 0           | -0.347966               | 2.399148  | 0.558685  |
| 20            | 6             | 0           | -2.156501               | 1.272073  | -1.240878 |
| 21            | 1             | 0           | -0.483309               | 0.177779  | -2.031106 |
| 22            | 6             | 0           | -1.680222               | 2.772165  | 0.608526  |
| 23            | 1             | 0           | 0.377628                | 2.803828  | 1.254645  |
| 24            | 6             | 0           | -2.591495               | 2.193731  | -0.283722 |
| 25            | 1             | 0           | -2.866894               | 0.837621  | -1.935761 |
| 26            | 1             | 0           | -2.020223               | 3.494727  | 1.341478  |
| 27            | 6             | 0           | -3.982968               | 2.549014  | -0.217457 |
| 28            | 7             | 0           | -5.103486               | 2.836247  | -0.165052 |
| 29            | 6             | 0           | 3.623890                | 0.526761  | 1.027458  |
| 30            | 6             | 0           | 5.023388                | 0.126422  | 1.467344  |
| 31            | 6             | 0           | 5.679253                | -0.407053 | -0.702010 |
| 32            | 6             | 0           | 4.316695                | -0.052494 | -1.278740 |
| 33            | 1             | 0           | 5.311199                | 0.731132  | 2.328085  |
| 34            | 1             | 0           | 3.587707                | 1.583247  | 0.762064  |
| 35            | 1             | 0           | 2.860766                | 0.289575  | 1.767413  |
| 36            | 1             | 0           | 6.447225                | -0.195142 | -1.447101 |
| 37            | 1             | 0           | 5.715539                | -1.479126 | -0.456763 |
| 38            | 1             | 0           | 4.274235                | 0.999237  | -1.569736 |
| 39            | 1             | 0           | 4.047219                | -0.687753 | -2.121926 |
| 40            | 1             | 0           | 5.044649                | -0.933053 | 1.762760  |
| 41            | 7             | 0           | 3.278537                | -0.249889 | -0.210227 |
| 42            | 1             | 0           | 3.225417                | -1.244477 | 0.054767  |
| 43            | 8             | 0           | 1.574125                | -0.620620 | -1.758154 |
| 44            | 8             | 0           | 5.963814                | 0.371422  | 0.440623  |

Total Energy (a.u.) = -1311.12141587; NIMAG = i220.28

**Table S34.** Cartesian coordinates, energy (u.a.) and number of imaginary frequencies (NIMAG) for concerted Transition State (TS2) associated to the departure of 4-cyanophenol for the reaction of compound **9** with morpholine, calculated using M06-2X/6-31G++(d,p) level theory

| Center Number | Atomic Number | Atomic Type | Coordinates (Angstroms) |           |           |
|---------------|---------------|-------------|-------------------------|-----------|-----------|
|               |               |             | X                       | Y         | Z         |
| 1             | 6             | 0           | -3.574904               | 0.168419  | -0.960536 |
| 2             | 6             | 0           | -2.239612               | -0.203557 | -0.907426 |
| 3             | 6             | 0           | -1.714254               | -0.619612 | 0.314888  |
| 4             | 6             | 0           | -2.473225               | -0.661803 | 1.479255  |
| 5             | 6             | 0           | -3.807564               | -0.284823 | 1.425486  |
| 6             | 8             | 0           | -0.376835               | -0.954540 | 0.449974  |
| 7             | 6             | 0           | -4.332729               | 0.118040  | 0.203957  |
| 8             | 1             | 0           | -4.026888               | 0.500699  | -1.886259 |
| 9             | 1             | 0           | -1.598133               | -0.161457 | -1.779574 |
| 10            | 1             | 0           | -2.015630               | -0.988173 | 2.405639  |
| 11            | 1             | 0           | -4.435120               | -0.303930 | 2.307030  |
| 12            | 7             | 0           | -5.742225               | 0.511662  | 0.141343  |
| 13            | 8             | 0           | -6.391924               | 0.476820  | 1.172455  |
| 14            | 8             | 0           | -6.191975               | 0.854067  | -0.938841 |
| 15            | 6             | 0           | 0.197282                | -1.645536 | -0.554229 |
| 16            | 6             | 0           | 1.357465                | 0.977323  | -1.202654 |
| 17            | 6             | 0           | 1.218990                | 2.998526  | 0.161277  |
| 18            | 6             | 0           | 0.611755                | 1.905914  | -0.427538 |
| 19            | 6             | 0           | 2.746340                | 1.235928  | -1.366969 |
| 20            | 1             | 0           | -0.453567               | 1.741576  | -0.303703 |
| 21            | 6             | 0           | 3.353269                | 2.329786  | -0.778179 |
| 22            | 1             | 0           | 3.325901                | 0.553579  | -1.983594 |
| 23            | 6             | 0           | 2.596800                | 3.221044  | -0.001326 |
| 24            | 1             | 0           | 4.416094                | 2.504381  | -0.913644 |
| 25            | 1             | 0           | 0.632655                | 3.692779  | 0.755202  |
| 26            | 6             | 0           | 3.222229                | 4.351537  | 0.614404  |
| 27            | 7             | 0           | 3.729559                | 5.266991  | 1.114844  |
| 28            | 6             | 0           | 2.154667                | -1.233954 | 1.064646  |
| 29            | 6             | 0           | 3.646760                | -1.507413 | 1.178475  |
| 30            | 6             | 0           | 3.481485                | -3.508944 | -0.000600 |
| 31            | 6             | 0           | 1.980495                | -3.353068 | -0.187631 |
| 32            | 1             | 0           | 4.013766                | -3.082905 | -0.864682 |
| 33            | 1             | 0           | 3.724110                | -4.570155 | 0.068149  |
| 34            | 1             | 0           | 1.429038                | -3.799597 | 0.642019  |
| 35            | 1             | 0           | 1.636096                | -3.769991 | -1.132590 |
| 36            | 1             | 0           | 4.013525                | -1.090391 | 2.117122  |
| 37            | 1             | 0           | 4.179614                | -1.019586 | 0.347565  |
| 38            | 1             | 0           | 1.604701                | -1.681578 | 1.893205  |
| 39            | 1             | 0           | 1.940146                | -0.166840 | 1.010175  |
| 40            | 8             | 0           | 0.815700                | -0.090101 | -1.724278 |
| 41            | 7             | 0           | 1.654776                | -1.886053 | -0.194808 |
| 42            | 1             | 0           | 2.115446                | -1.440141 | -1.005242 |
| 43            | 8             | 0           | -0.335776               | -2.378701 | -1.334423 |
| 44            | 8             | 0           | 3.912308                | -2.894208 | 1.195331  |

Total Energy (a.u.) = -1311.12141587; NIMAG = i227.78



**Table S35.** Cartesian coordinates, energy (u.a.) and number of imaginary frequencies (NIMAG) for Transition State (TS1) associated to the nucleophilic attack of piperidine to compound **9**, calculated using M06-2X/6-31G++(d,p) level theory

| Center Number | Atomic Number | Atomic Type | Coordinates (Angstroms) |           |           |
|---------------|---------------|-------------|-------------------------|-----------|-----------|
|               |               |             | X                       | Y         | Z         |
| 1             | 6             | 0           | -2.247754               | -2.701564 | -0.915717 |
| 2             | 6             | 0           | -1.161730               | -1.843928 | -0.963021 |
| 3             | 6             | 0           | -1.163793               | -0.678160 | -0.194567 |
| 4             | 6             | 0           | -2.243980               | -0.346619 | 0.624621  |
| 5             | 6             | 0           | -3.331836               | -1.209415 | 0.674315  |
| 6             | 6             | 0           | -3.316819               | -2.367116 | -0.091765 |
| 7             | 1             | 0           | -2.271684               | -3.613095 | -1.498655 |
| 8             | 1             | 0           | -0.300535               | -2.061547 | -1.583987 |
| 9             | 1             | 0           | -2.234733               | 0.557185  | 1.215238  |
| 10            | 1             | 0           | -4.187861               | -0.985197 | 1.297880  |
| 11            | 7             | 0           | -4.468100               | -3.267446 | -0.030590 |
| 12            | 8             | 0           | -5.401935               | -2.955839 | 0.689193  |
| 13            | 8             | 0           | -4.434929               | -4.284418 | -0.702908 |
| 14            | 8             | 0           | -0.042618               | 0.102937  | -0.368510 |
| 15            | 6             | 0           | 0.451125                | 0.891505  | 0.625799  |
| 16            | 8             | 0           | 1.770112                | 1.162410  | 0.343577  |
| 17            | 6             | 0           | 2.626720                | 0.094060  | 0.231506  |
| 18            | 6             | 0           | 2.356907                | -1.151712 | 0.798922  |
| 19            | 6             | 0           | 3.818227                | 0.338693  | -0.448884 |
| 20            | 6             | 0           | 3.292297                | -2.168345 | 0.669437  |
| 21            | 1             | 0           | 1.436924                | -1.325418 | 1.347239  |
| 22            | 6             | 0           | 4.754016                | -0.675568 | -0.569471 |
| 23            | 1             | 0           | 3.990753                | 1.320575  | -0.874060 |
| 24            | 6             | 0           | 4.490375                | -1.933814 | -0.013639 |
| 25            | 1             | 0           | 3.098230                | -3.142217 | 1.104418  |
| 26            | 1             | 0           | 5.685251                | -0.499401 | -1.095741 |
| 27            | 6             | 0           | 5.458023                | -2.988372 | -0.143625 |
| 28            | 7             | 0           | 6.239576                | -3.836204 | -0.249847 |
| 29            | 6             | 0           | 0.597702                | 3.917335  | 0.255466  |
| 30            | 6             | 0           | 0.151223                | 5.308858  | -0.197258 |
| 31            | 6             | 0           | -2.076529               | 4.326434  | -0.814013 |
| 32            | 6             | 0           | -1.559603               | 2.967061  | -0.339224 |
| 33            | 1             | 0           | 0.670896                | 6.072698  | 0.390353  |
| 34            | 1             | 0           | 0.394477                | 3.790644  | 1.328168  |
| 35            | 1             | 0           | 1.671017                | 3.773217  | 0.106011  |
| 36            | 1             | 0           | -3.160253               | 4.380852  | -0.668758 |
| 37            | 1             | 0           | -1.886555               | 4.424242  | -1.890817 |
| 38            | 1             | 0           | -1.818037               | 2.826773  | 0.720527  |
| 39            | 1             | 0           | -2.018473               | 2.148573  | -0.903864 |
| 40            | 1             | 0           | 0.442193                | 5.453123  | -1.246151 |
| 41            | 7             | 0           | -0.105788               | 2.832012  | -0.433178 |
| 42            | 1             | 0           | 0.179500                | 2.796764  | -1.410521 |
| 43            | 8             | 0           | -0.039140               | 1.067242  | 1.706725  |
| 44            | 6             | 0           | -1.366081               | 5.455103  | -0.063834 |
| 45            | 1             | 0           | -1.694083               | 6.430532  | -0.435825 |
| 46            | 1             | 0           | -1.639688               | 5.407883  | 0.998934  |

Total Energy (a.u.) = -1275.24897809; NIMAG = i128.72

**Table S36.** Cartesian coordinates, energy (u.a.) and number of imaginary frequencies (NIMAG) for concerted Transition State (CTS) associated to the departure of 4-nitrophenol for the reaction of compound **9** with piperidine, calculated using M06-2X/6-31G++(d,p) level theory

| Center Number | Atomic Number | Atomic Type | Coordinates (Angstroms) |           |           |
|---------------|---------------|-------------|-------------------------|-----------|-----------|
|               |               |             | X                       | Y         | Z         |
| 1             | 6             | 0           | -1.917079               | -2.586522 | -0.902439 |
| 2             | 6             | 0           | -0.673771               | -2.071955 | -0.602835 |
| 3             | 6             | 0           | -0.433080               | -1.378253 | 0.620428  |
| 4             | 6             | 0           | -1.529828               | -1.261869 | 1.526699  |
| 5             | 6             | 0           | -2.770178               | -1.783154 | 1.232528  |
| 6             | 6             | 0           | -2.964905               | -2.438854 | 0.011762  |
| 7             | 1             | 0           | -2.095904               | -3.112079 | -1.832967 |
| 8             | 1             | 0           | 0.145853                | -2.189652 | -1.301689 |
| 9             | 1             | 0           | -1.357378               | -0.760351 | 2.473628  |
| 10            | 1             | 0           | -3.596697               | -1.693834 | 1.927518  |
| 11            | 7             | 0           | -4.258558               | -2.980168 | -0.302584 |
| 12            | 8             | 0           | -5.166245               | -2.848329 | 0.513575  |
| 13            | 8             | 0           | -4.411707               | -3.554112 | -1.377051 |
| 14            | 8             | 0           | 0.724564                | -0.883540 | 0.922501  |
| 15            | 6             | 0           | 1.663240                | 0.263016  | -0.521522 |
| 16            | 8             | 0           | 1.655625                | 1.407442  | 0.186883  |
| 17            | 6             | 0           | 0.496079                | 2.170291  | 0.078972  |
| 18            | 6             | 0           | 0.354557                | 3.070542  | -0.968035 |
| 19            | 6             | 0           | -0.460816               | 2.020489  | 1.074179  |
| 20            | 6             | 0           | -0.790506               | 3.855528  | -1.017233 |
| 21            | 1             | 0           | 1.128900                | 3.154238  | -1.721536 |
| 22            | 6             | 0           | -1.606043               | 2.802356  | 1.023000  |
| 23            | 1             | 0           | -0.291086               | 1.292982  | 1.858131  |
| 24            | 6             | 0           | -1.766552               | 3.718538  | -0.023077 |
| 25            | 1             | 0           | -0.930265               | 4.571720  | -1.818543 |
| 26            | 1             | 0           | -2.371051               | 2.706147  | 1.784914  |
| 27            | 6             | 0           | -2.950341               | 4.535478  | -0.075637 |
| 28            | 7             | 0           | -3.901863               | 5.193374  | -0.116087 |
| 29            | 6             | 0           | 3.548314                | -0.136009 | 1.143887  |
| 30            | 6             | 0           | 4.688857                | -1.097331 | 1.441613  |
| 31            | 6             | 0           | 5.054768                | -1.418846 | -1.019284 |
| 32            | 6             | 0           | 3.900353                | -0.471298 | -1.310765 |
| 33            | 1             | 0           | 5.138114                | -0.795216 | 2.390916  |
| 34            | 1             | 0           | 3.902917                | 0.891108  | 1.039830  |
| 35            | 1             | 0           | 2.751031                | -0.176342 | 1.884274  |
| 36            | 1             | 0           | 5.765425                | -1.341588 | -1.845883 |
| 37            | 1             | 0           | 4.680464                | -2.449571 | -1.012688 |
| 38            | 1             | 0           | 4.235449                | 0.566513  | -1.393276 |
| 39            | 1             | 0           | 3.347401                | -0.745069 | -2.208543 |
| 40            | 1             | 0           | 4.286697                | -2.107529 | 1.584148  |
| 41            | 7             | 0           | 2.914522                | -0.505104 | -0.172134 |
| 42            | 1             | 0           | 2.538298                | -1.455918 | -0.061449 |
| 43            | 8             | 0           | 1.114279                | 0.057683  | -1.566971 |
| 44            | 6             | 0           | 5.723881                | -1.094918 | 0.316595  |
| 45            | 1             | 0           | 6.512363                | -1.821552 | 0.525951  |
| 46            | 1             | 0           | 6.196941                | -0.107254 | 0.258371  |

Total Energy (a.u.) = -1275.24025347; NIMAG = i205.31

**Table S37.** Cartesian coordinates, energy (u.a.) and number of imaginary frequencies (NIMAG) for concerted Transition State (CTS) associated to the departure of 4-cyanophenol for the reaction of compound 9 with piperidine, calculated using M06-2X/6-31G++(d,p) level theory

| Center Number | Atomic Number | Atomic Type | Coordinates (Angstroms) |           |           |
|---------------|---------------|-------------|-------------------------|-----------|-----------|
|               |               |             | X                       | Y         | Z         |
| 1             | 6             | 0           | 2.906965                | -0.940550 | 0.871284  |
| 2             | 6             | 0           | 1.527247                | -0.814106 | 0.807212  |
| 3             | 6             | 0           | 0.850274                | -1.445212 | -0.234769 |
| 4             | 6             | 0           | 1.506113                | -2.179485 | -1.215988 |
| 5             | 6             | 0           | 2.887092                | -2.301038 | -1.154132 |
| 6             | 8             | 0           | -0.518886               | -1.308530 | -0.392926 |
| 7             | 6             | 0           | 3.559182                | -1.681697 | -0.107791 |
| 8             | 1             | 0           | 3.475782                | -0.468581 | 1.662019  |
| 9             | 1             | 0           | 0.974583                | -0.242124 | 1.542991  |
| 10            | 1             | 0           | 0.933781                | -2.645337 | -2.009340 |
| 11            | 1             | 0           | 3.437195                | -2.865325 | -1.895896 |
| 12            | 7             | 0           | 5.016194                | -1.812143 | -0.035574 |
| 13            | 8             | 0           | 5.576413                | -2.454371 | -0.907489 |
| 14            | 8             | 0           | 5.592955                | -1.271215 | 0.892342  |
| 15            | 6             | 0           | -1.281190               | -1.314888 | 0.719241  |
| 16            | 6             | 0           | -0.763059               | 1.758339  | 0.749734  |
| 17            | 6             | 0           | 0.433615                | 3.012559  | -0.975343 |
| 18            | 6             | 0           | -0.133197               | 1.834766  | -0.524901 |
| 19            | 6             | 0           | -0.773165               | 2.948237  | 1.534531  |
| 20            | 1             | 0           | -0.103026               | 0.950369  | -1.151994 |
| 21            | 6             | 0           | -0.208454               | 4.120623  | 1.081463  |
| 22            | 1             | 0           | -1.247546               | 2.902510  | 2.509497  |
| 23            | 6             | 0           | 0.406259                | 4.170802  | -0.183110 |
| 24            | 1             | 0           | -0.232128               | 5.012698  | 1.699986  |
| 25            | 1             | 0           | 0.906067                | 3.046663  | -1.952499 |
| 26            | 6             | 0           | 0.990731                | 5.385990  | -0.656579 |
| 27            | 7             | 0           | 1.463057                | 6.374350  | -1.040893 |
| 28            | 6             | 0           | -2.954052               | -0.487593 | -1.020072 |
| 29            | 6             | 0           | -4.442166               | -0.230152 | -1.210927 |
| 30            | 6             | 0           | -4.968661               | -2.170328 | 0.286368  |
| 31            | 6             | 0           | -3.480957               | -2.418005 | 0.480171  |
| 32            | 1             | 0           | -5.335007               | -1.530930 | 1.098532  |
| 33            | 1             | 0           | -5.480016               | -3.131732 | 0.378378  |
| 34            | 1             | 0           | -3.079485               | -3.101091 | -0.273666 |
| 35            | 1             | 0           | -3.244069               | -2.795723 | 1.473945  |
| 36            | 1             | 0           | -4.576870               | 0.210762  | -2.201656 |
| 37            | 1             | 0           | -4.780171               | 0.514684  | -0.480388 |
| 38            | 1             | 0           | -2.565730               | -1.183499 | -1.766157 |
| 39            | 1             | 0           | -2.364353               | 0.428696  | -1.033360 |
| 40            | 8             | 0           | -1.311363               | 0.679729  | 1.220264  |
| 41            | 7             | 0           | -2.721860               | -1.124340 | 0.322044  |
| 42            | 1             | 0           | -3.032984               | -0.448607 | 1.034028  |
| 43            | 6             | 0           | -5.253159               | -1.518181 | -1.065700 |
| 44            | 1             | 0           | -6.320155               | -1.305374 | -1.164304 |
| 45            | 1             | 0           | -4.982722               | -2.212163 | -1.870620 |
| 46            | 8             | 0           | -1.031794               | -1.843295 | 1.762474  |

Total Energy (a.u.) = -1275.23675630; NIMAG = i154.77

**Table S38.** Cartesian coordinates, energy (u.a.) for the intermediate structure (T $\pm$ ) associated to the reaction of compound **9** with piperidine in acetonitrile, calculated using M06-2X/6-31G++(d,p) level theory

| Center Number | Atomic Number | Atomic Type | Coordinates (Angstroms) |           |           |
|---------------|---------------|-------------|-------------------------|-----------|-----------|
|               |               |             | X                       | Y         | Z         |
| 1             | 6             | 0           | -2.813867               | -1.671762 | 1.093809  |
| 2             | 6             | 0           | -1.666391               | -0.919817 | 1.273157  |
| 3             | 6             | 0           | -2.818164               | -2.646114 | 0.100389  |
| 4             | 1             | 0           | -3.697008               | -1.508610 | 1.698320  |
| 5             | 6             | 0           | -0.537533               | -1.151329 | 0.476825  |
| 6             | 1             | 0           | -1.617858               | -0.139595 | 2.024247  |
| 7             | 6             | 0           | -1.711046               | -2.887975 | -0.704262 |
| 8             | 7             | 0           | -4.024910               | -3.440277 | -0.102173 |
| 9             | 6             | 0           | -0.557561               | -2.140092 | -0.514906 |
| 10            | 1             | 0           | -1.756945               | -3.659874 | -1.462393 |
| 11            | 8             | 0           | -4.025393               | -4.269573 | -0.998283 |
| 12            | 8             | 0           | -4.977037               | -3.236451 | 0.634521  |
| 13            | 1             | 0           | 0.312012                | -2.304867 | -1.134664 |
| 14            | 1             | 0           | 2.913267                | -0.063819 | 1.248512  |
| 15            | 7             | 0           | 2.848250                | -0.353966 | 0.267768  |
| 16            | 6             | 0           | 2.930504                | -1.841530 | 0.182293  |
| 17            | 6             | 0           | 3.938970                | 0.299943  | -0.519097 |
| 18            | 6             | 0           | 5.310546                | -0.183054 | -0.066408 |
| 19            | 1             | 0           | 3.821297                | 1.375669  | -0.395970 |
| 20            | 1             | 0           | -0.830565               | 1.001871  | -1.115973 |
| 21            | 6             | 0           | 4.287754                | -2.349982 | 0.649188  |
| 22            | 1             | 0           | 1.517734                | 3.857748  | 1.068459  |
| 23            | 1             | 0           | 6.062851                | 0.301217  | -0.694687 |
| 24            | 1             | 0           | 5.490376                | 0.149002  | 0.963419  |
| 25            | 1             | 0           | 3.736294                | 0.038760  | -1.561461 |
| 26            | 8             | 0           | 0.554395                | -0.403392 | 0.785775  |
| 27            | 1             | 0           | 4.296689                | -3.437525 | 0.539361  |
| 28            | 1             | 0           | 2.754522                | -2.080866 | -0.870645 |
| 29            | 1             | 0           | 2.113836                | -2.245245 | 0.782257  |
| 30            | 6             | 0           | -1.783486               | 2.878540  | -0.694649 |
| 31            | 6             | 0           | 0.454115                | 2.332935  | 0.001235  |
| 32            | 6             | 0           | -0.458388               | 4.508295  | 0.515505  |
| 33            | 8             | 0           | 1.537307                | 1.526960  | 0.126779  |
| 34            | 6             | 0           | 0.586200                | 3.603902  | 0.575534  |
| 35            | 6             | 0           | -1.654603               | 4.146868  | -0.118887 |
| 36            | 1             | 0           | 4.411069                | -2.133224 | 1.717131  |
| 37            | 6             | 0           | 1.409680                | 0.139318  | -0.262855 |
| 38            | 6             | 0           | -0.735677               | 1.970315  | -0.642681 |
| 39            | 1             | 0           | -2.707710               | 2.603873  | -1.191340 |
| 40            | 6             | 0           | -2.745303               | 5.078093  | -0.183521 |
| 41            | 8             | 0           | 1.196694                | -0.143474 | -1.445365 |
| 42            | 1             | 0           | -0.355485               | 5.491441  | 0.961251  |
| 43            | 7             | 0           | -3.625608               | 5.829424  | -0.236690 |
| 44            | 6             | 0           | 5.418591                | -1.704471 | -0.149645 |
| 45            | 1             | 0           | 6.388625                | -2.038844 | 0.226651  |
| 46            | 1             | 0           | 5.349102                | -2.018437 | -1.198377 |

Total Energy (a.u.) = -1275.26064431

**Table S39.** Cartesian coordinates, energy (u.a.) and number of imaginary frequencies (NIMAG) for concerted Transition State (TS2) associated to the departure of 4-nitrophenol for the reaction of compound **9** with piperidine in acetonitrile, calculated using M06-2X/6-31G++(d,p) level theory

| Center Number | Atomic Number | Atomic Type | Coordinates (Angstroms) |           |           |
|---------------|---------------|-------------|-------------------------|-----------|-----------|
|               |               |             | X                       | Y         | Z         |
| 1             | 6             | 0           | 3.607436                | -1.203443 | 0.826526  |
| 2             | 6             | 0           | 2.669444                | -0.264593 | 1.194108  |
| 3             | 6             | 0           | 1.312447                | -0.354766 | 0.760773  |
| 4             | 6             | 0           | 0.968584                | -1.449861 | -0.087410 |
| 5             | 6             | 0           | 1.908504                | -2.386982 | -0.459394 |
| 6             | 8             | 0           | 0.442604                | 0.527171  | 1.128434  |
| 7             | 6             | 0           | 3.224623                | -2.265170 | -0.001058 |
| 8             | 1             | 0           | 4.635279                | -1.134749 | 1.162232  |
| 9             | 1             | 0           | 2.940437                | 0.570234  | 1.832967  |
| 10            | 1             | 0           | -0.055975               | -1.529840 | -0.433972 |
| 11            | 1             | 0           | 1.645685                | -3.222466 | -1.097539 |
| 12            | 7             | 0           | 4.201159                | -3.246847 | -0.385901 |
| 13            | 8             | 0           | 5.350282                | -3.128243 | 0.029958  |
| 14            | 8             | 0           | 3.853424                | -4.170046 | -1.116635 |
| 15            | 6             | 0           | -0.729033               | 1.415890  | -0.361382 |
| 16            | 6             | 0           | -2.591021               | 0.166326  | 0.229526  |
| 17            | 6             | 0           | -3.101226               | -2.016513 | 1.053267  |
| 18            | 6             | 0           | -2.339874               | -0.858429 | 1.133836  |
| 19            | 6             | 0           | -3.564476               | 0.076202  | -0.755786 |
| 20            | 1             | 0           | -1.549378               | -0.731088 | 1.863892  |
| 21            | 6             | 0           | -4.325239               | -1.082945 | -0.835227 |
| 22            | 1             | 0           | -3.721782               | 0.902771  | -1.438952 |
| 23            | 6             | 0           | -4.092366               | -2.124312 | 0.070409  |
| 24            | 1             | 0           | -5.095236               | -1.183711 | -1.591246 |
| 25            | 1             | 0           | -2.932825               | -2.832907 | 1.746143  |
| 26            | 6             | 0           | -4.886746               | -3.322024 | -0.007363 |
| 27            | 7             | 0           | -5.526979               | -4.284491 | -0.067701 |
| 28            | 6             | 0           | 1.276128                | 2.824983  | -0.664193 |
| 29            | 6             | 0           | 2.006759                | 4.063762  | -0.170798 |
| 30            | 6             | 0           | -0.194796               | 5.151719  | 0.330313  |
| 31            | 6             | 0           | -0.919206               | 3.903690  | -0.153190 |
| 32            | 1             | 0           | -0.058800               | 5.090006  | 1.416481  |
| 33            | 1             | 0           | -0.847015               | 6.007036  | 0.136903  |
| 34            | 1             | 0           | -1.134852               | 3.947263  | -1.224504 |
| 35            | 1             | 0           | -1.842524               | 3.722844  | 0.394683  |
| 36            | 1             | 0           | 2.946522                | 4.136117  | -0.723830 |
| 37            | 1             | 0           | 2.266876                | 3.936763  | 0.887381  |
| 38            | 1             | 0           | 1.041486                | 2.881679  | -1.729109 |
| 39            | 1             | 0           | 1.827732                | 1.905271  | -0.469092 |
| 40            | 8             | 0           | -1.863597               | 1.346285  | 0.361265  |
| 41            | 7             | 0           | -0.041722               | 2.690851  | 0.046630  |
| 42            | 1             | 0           | 0.156275                | 2.544817  | 1.046246  |
| 43            | 6             | 0           | 1.157377                | 5.320080  | -0.360508 |
| 44            | 1             | 0           | 1.677580                | 6.192586  | 0.041609  |
| 45            | 1             | 0           | 1.001704                | 5.497273  | -1.431390 |
| 46            | 8             | 0           | -0.489253               | 0.877563  | -1.402372 |

Total Energy (a.u.) = -1275.24381243; NIMAG = **i161.52**

**Table S40.** Cartesian coordinates, energy (u.a.) and number of imaginary frequencies (NIMAG) for concerted Transition State (TS2) associated to the departure of 4-cyanophenol for the reaction of compound **9** with piperidine in acetonitrile, calculated using M06-2X/6-31G++(d,p) level theory

| Center Number | Atomic Number | Atomic Type | Coordinates (Angstroms) |           |           |
|---------------|---------------|-------------|-------------------------|-----------|-----------|
|               |               |             | X                       | Y         | Z         |
| 1             | 6             | 0           | -4.049534               | -1.160835 | -0.664743 |
| 2             | 6             | 0           | -2.797278               | -1.752420 | -0.561996 |
| 3             | 6             | 0           | -1.844876               | -1.159910 | 0.256359  |
| 4             | 6             | 0           | -2.086900               | 0.005257  | 0.975839  |
| 5             | 6             | 0           | -3.337013               | 0.600623  | 0.871111  |
| 6             | 6             | 0           | -4.290336               | 0.003525  | 0.054197  |
| 7             | 1             | 0           | -4.826009               | -1.585704 | -1.287568 |
| 8             | 1             | 0           | -2.556269               | -2.661221 | -1.100617 |
| 9             | 1             | 0           | -1.291593               | 0.416331  | 1.587379  |
| 10            | 1             | 0           | -3.577852               | 1.506912  | 1.411570  |
| 11            | 7             | 0           | -5.612982               | 0.629436  | -0.051696 |
| 12            | 8             | 0           | -5.814150               | 1.650462  | 0.582579  |
| 13            | 8             | 0           | -6.441174               | 0.095371  | -0.768924 |
| 14            | 8             | 0           | -0.614845               | -1.792587 | 0.405898  |
| 15            | 6             | 0           | 0.391009                | -1.305596 | -0.343106 |
| 16            | 8             | 0           | 1.017363                | 0.069282  | 1.158129  |
| 17            | 6             | 0           | 1.451416                | 1.221394  | 0.750109  |
| 18            | 6             | 0           | 2.719718                | 1.717718  | 1.166012  |
| 19            | 6             | 0           | 0.691550                | 2.041232  | -0.131885 |
| 20            | 6             | 0           | 3.185857                | 2.947907  | 0.748115  |
| 21            | 1             | 0           | 3.312262                | 1.097862  | 1.832500  |
| 22            | 6             | 0           | 1.162593                | 3.269346  | -0.552595 |
| 23            | 1             | 0           | -0.271512               | 1.675024  | -0.471808 |
| 24            | 6             | 0           | 2.413019                | 3.741419  | -0.117706 |
| 25            | 1             | 0           | 4.153297                | 3.308897  | 1.083748  |
| 26            | 1             | 0           | 0.566059                | 3.881454  | -1.222397 |
| 27            | 6             | 0           | 2.895465                | 5.014025  | -0.555086 |
| 28            | 7             | 0           | 3.287688                | 6.046533  | -0.912237 |
| 29            | 6             | 0           | 2.812841                | -1.569157 | -0.733168 |
| 30            | 6             | 0           | 4.077749                | -2.248888 | -0.232999 |
| 31            | 6             | 0           | 2.725225                | -4.249448 | 0.438965  |
| 32            | 6             | 0           | 1.462869                | -3.555796 | -0.052525 |
| 33            | 1             | 0           | 4.912312                | -1.882735 | -0.836043 |
| 34            | 1             | 0           | 2.604057                | -1.805850 | -1.778695 |
| 35            | 1             | 0           | 2.842636                | -0.486209 | -0.612093 |
| 36            | 1             | 0           | 2.578795                | -5.325649 | 0.317351  |
| 37            | 1             | 0           | 2.843728                | -4.060269 | 1.512553  |
| 38            | 1             | 0           | 1.267524                | -3.765424 | -1.108033 |
| 39            | 1             | 0           | 0.588528                | -3.824155 | 0.537653  |
| 40            | 1             | 0           | 4.270550                | -1.940611 | 0.801973  |
| 41            | 7             | 0           | 1.628852                | -2.059163 | 0.052889  |
| 42            | 1             | 0           | 1.765491                | -1.766946 | 1.032942  |
| 43            | 8             | 0           | 0.312859                | -0.713410 | -1.378441 |
| 44            | 6             | 0           | 3.961609                | -3.770380 | -0.320226 |
| 45            | 1             | 0           | 3.883809                | -4.070449 | -1.372204 |
| 46            | 1             | 0           | 4.858944                | -4.241946 | 0.087136  |

Total Energy (a.u.) = -1275.24056202; NIMAG = i159.34

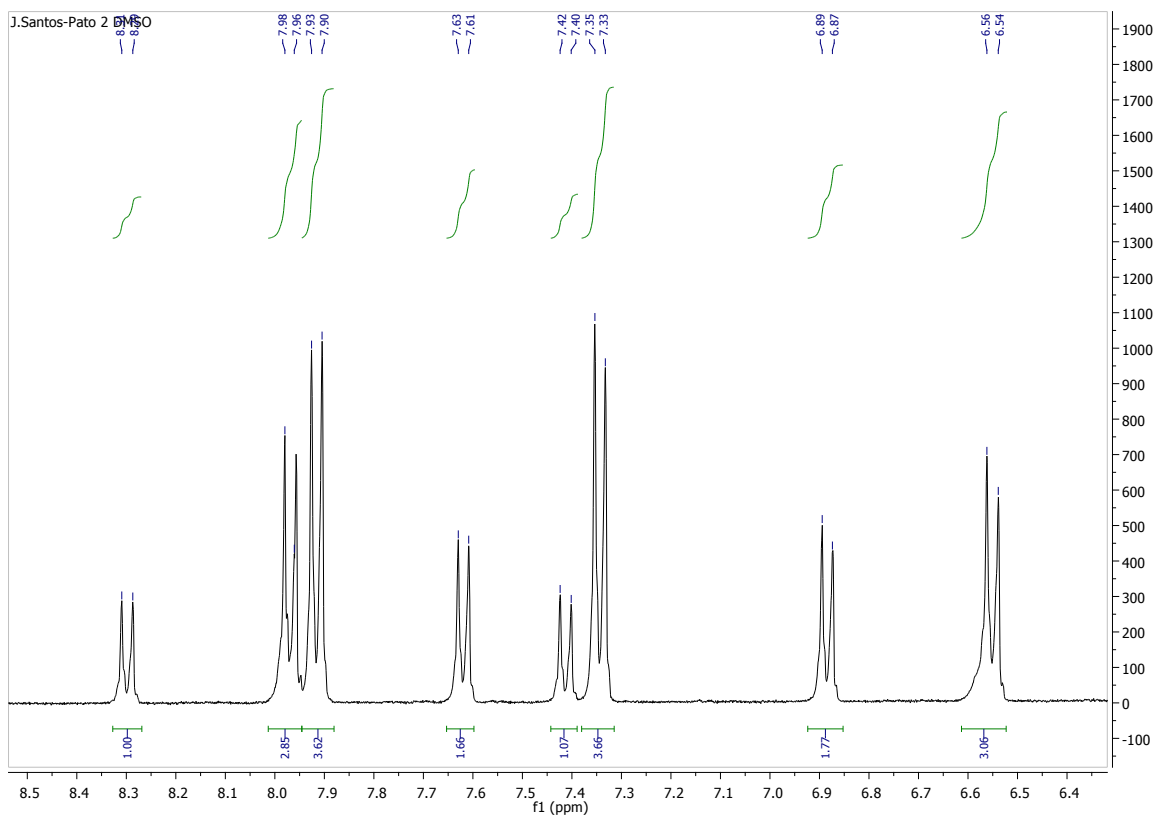

Figure S10.-  $^1\text{H}$ -NMR spectrum for the reaction of **7** with excess of morpholine in dimethyl sulfoxide- $\text{d}_6$ .

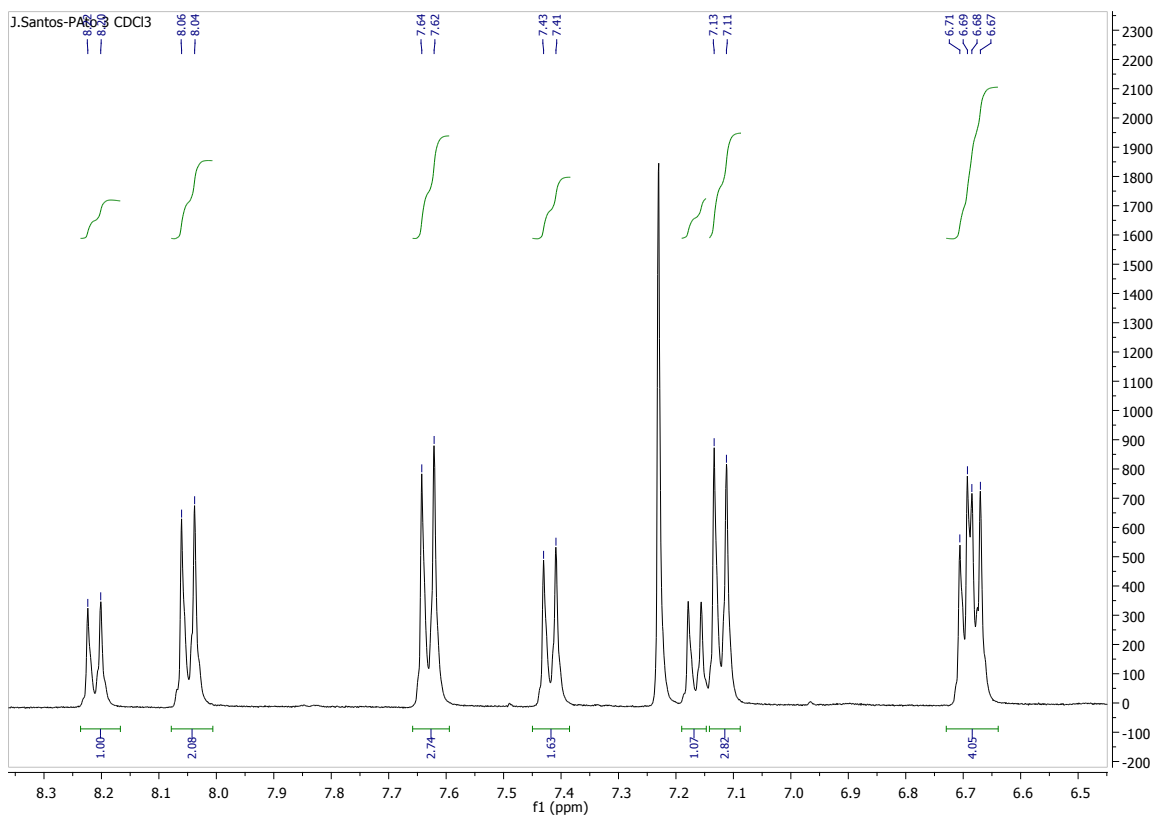

Figure S11.- <sup>1</sup>H-NMR spectrum for the reaction of **7** with excess of morpholine in chloroform-d<sub>1</sub>



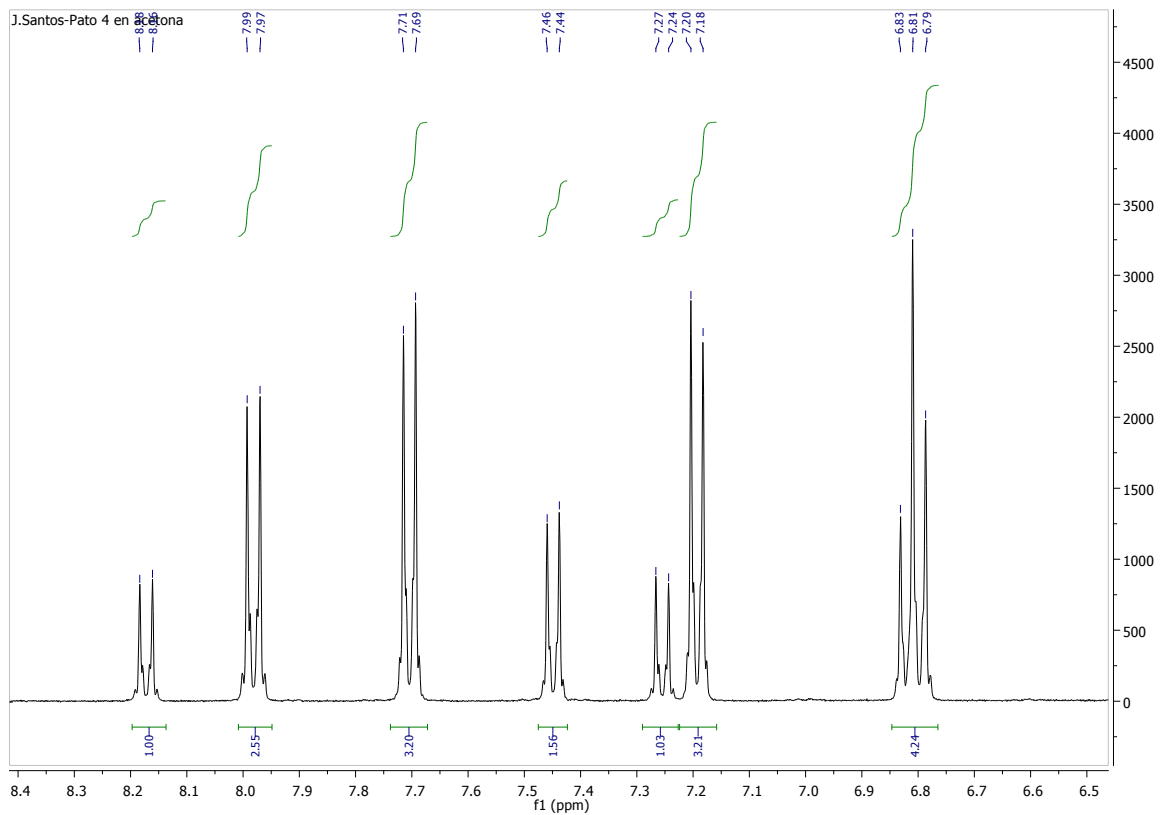

Figure S12.-  $^1\text{H-NMR}$  spectrum for the reaction of **7** with excess of morpholine in acetone- $\text{d}_6$ .

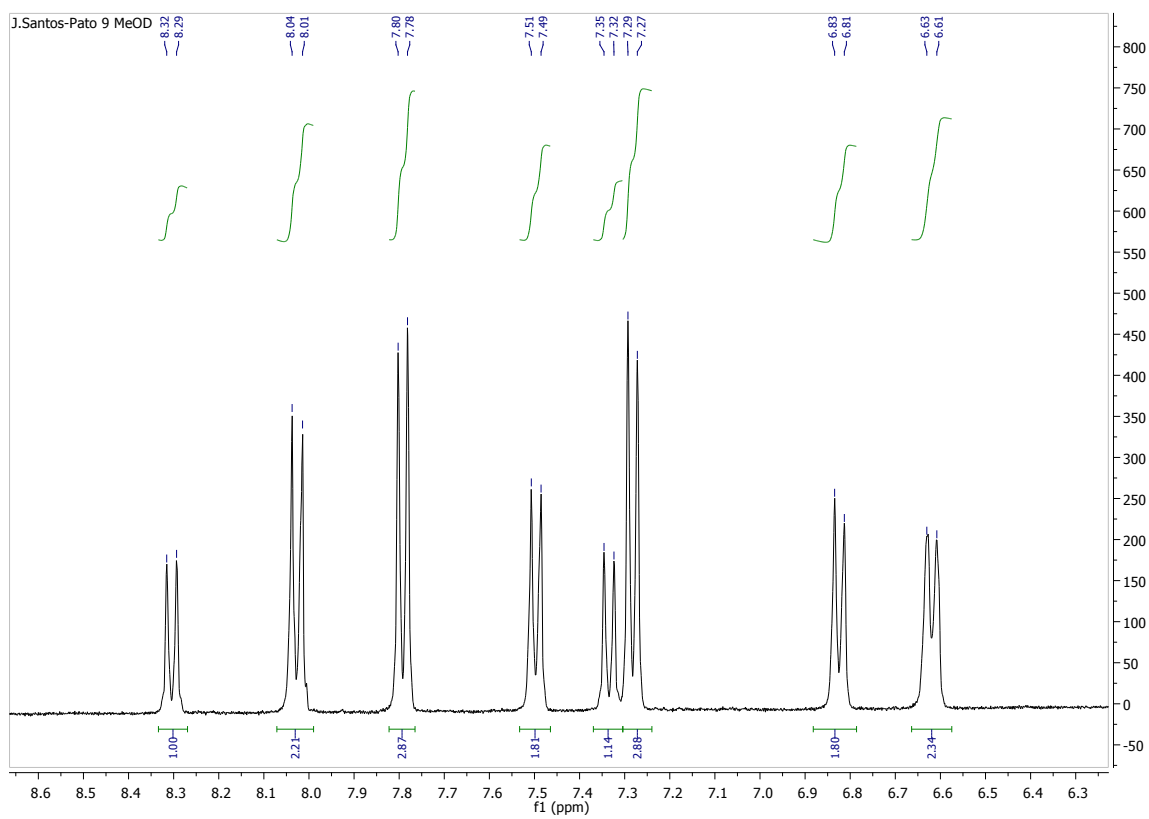

Figure S13.-  $^1\text{H-NMR}$  spectrum for the reaction of **7** with excess of morpholine in methanol- $\text{d}_4$ .

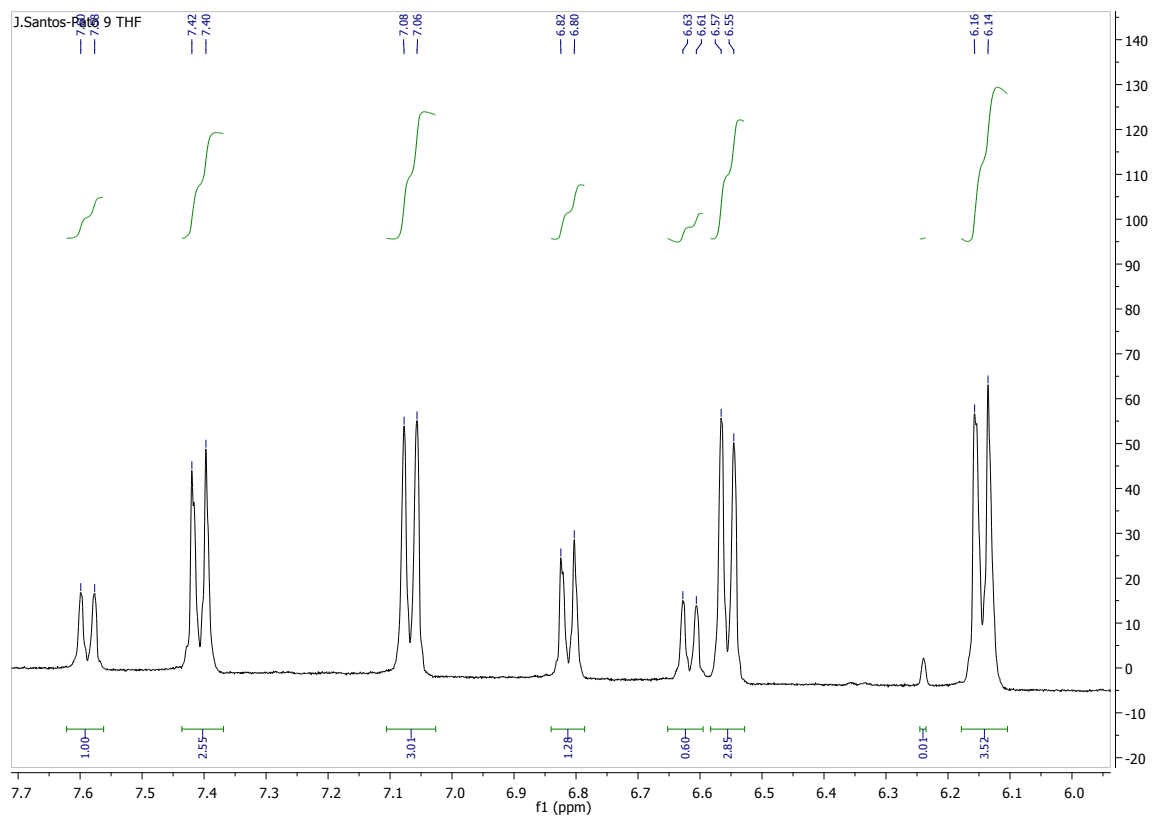

Figure S14.-  $^1\text{H}$ -NMR spectrum for the reaction of **7** with excess of morpholine in tetrahydrofuran- $d_8$ .

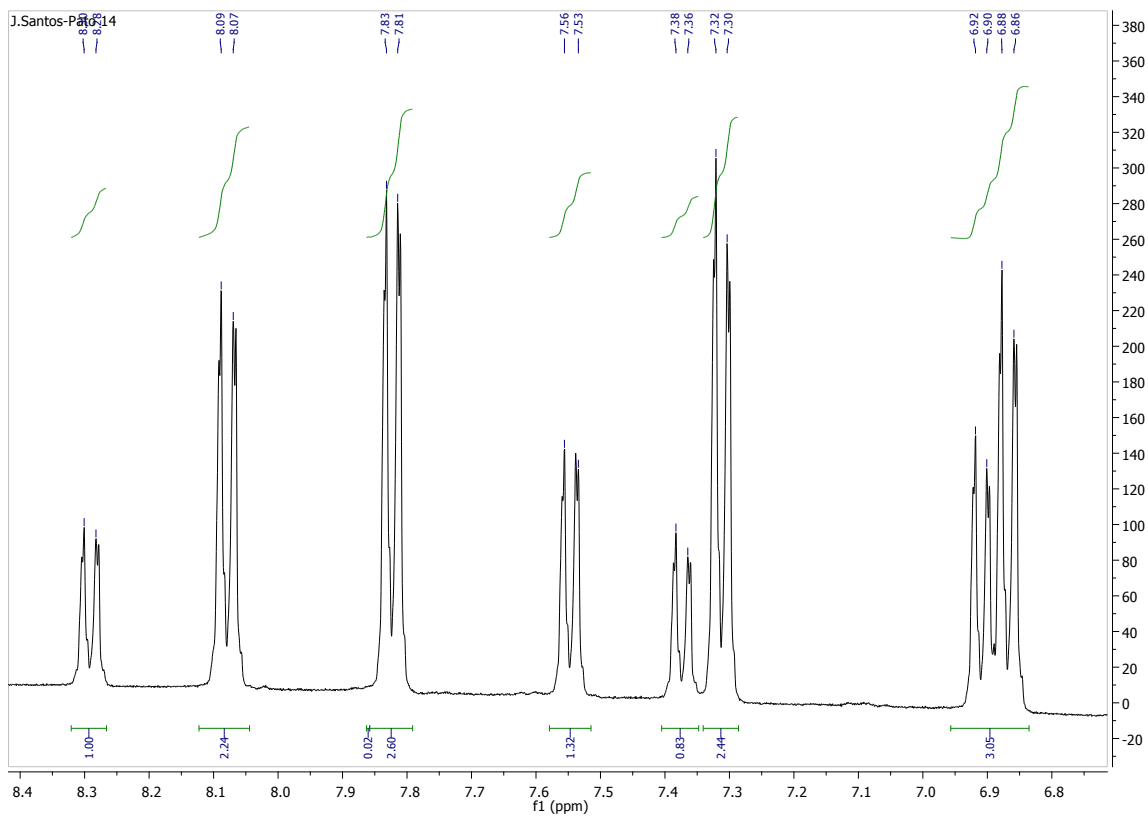

Figure S15.- <sup>1</sup>H-NMR spectrum for the reaction of **7** with excess of morpholine in acetone

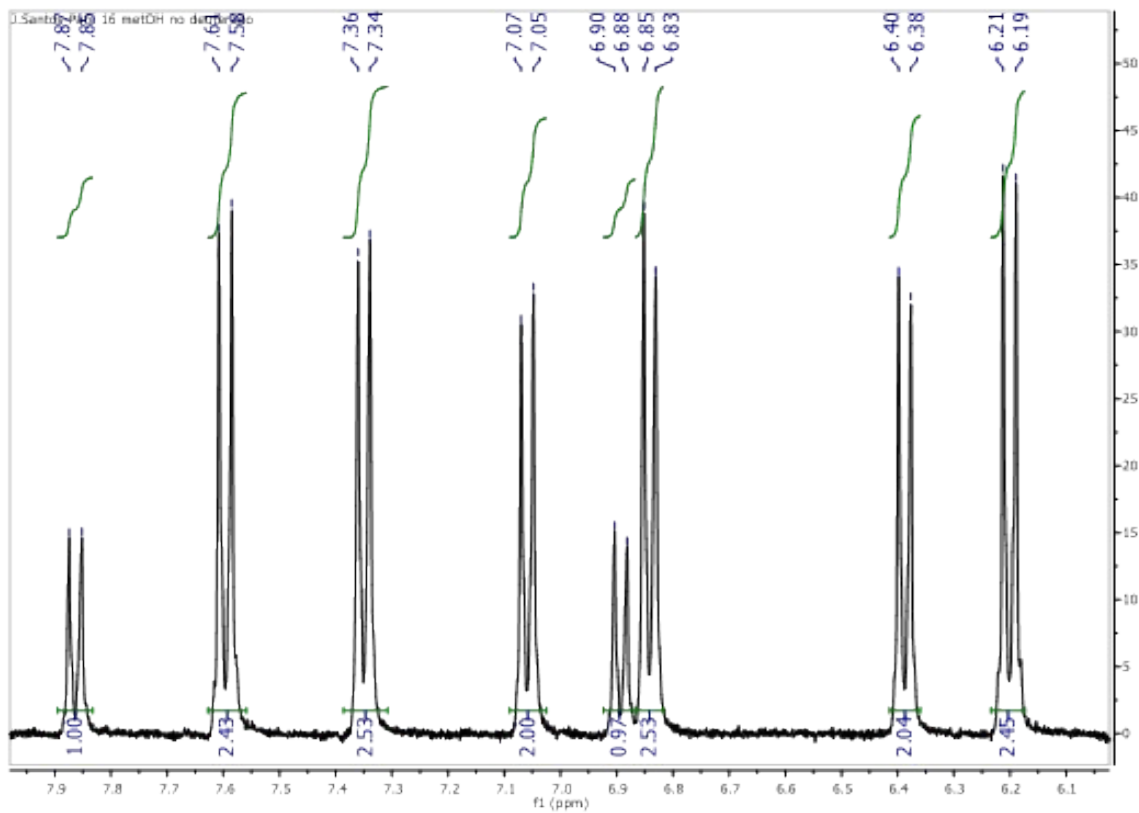

Figure S16.- <sup>1</sup>H-NMR spectrum for the reaction of **7** with excess of morpholine in methanol.

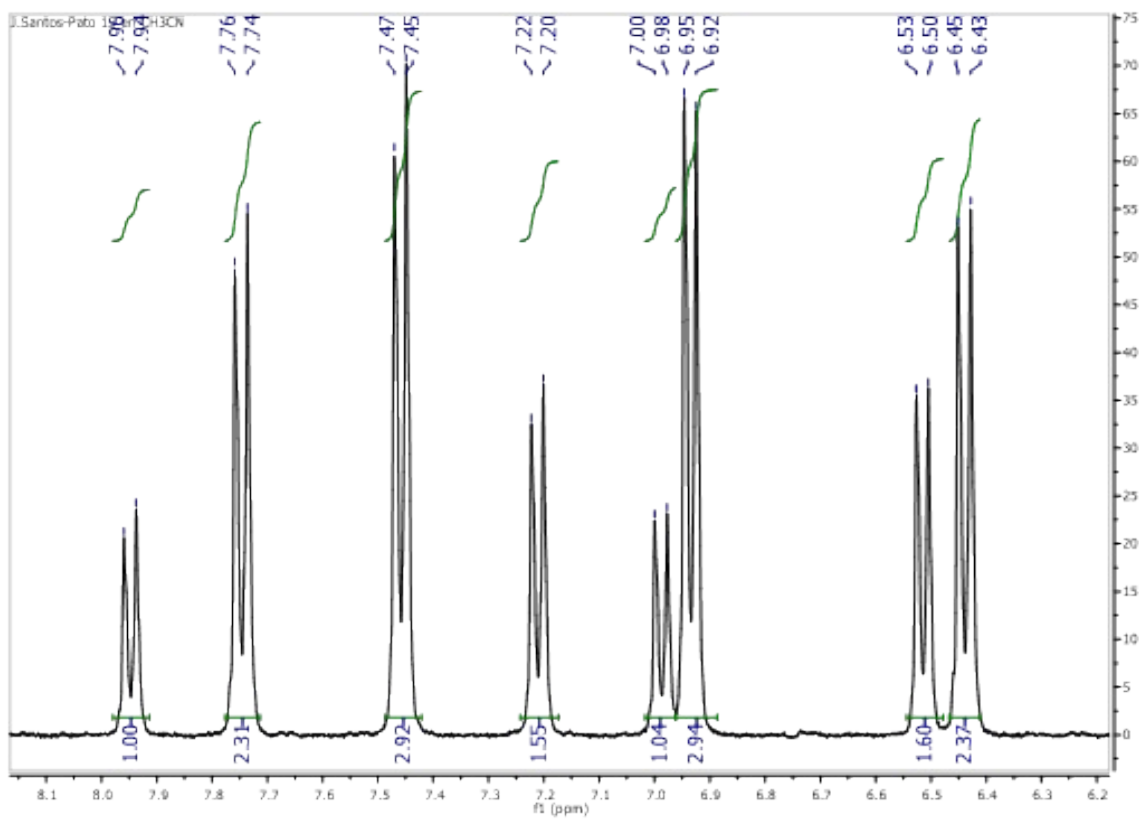

Figure S17.- <sup>1</sup>H-NMR spectrum for the reaction of **7** with excess of morpholine in acetonitrile.

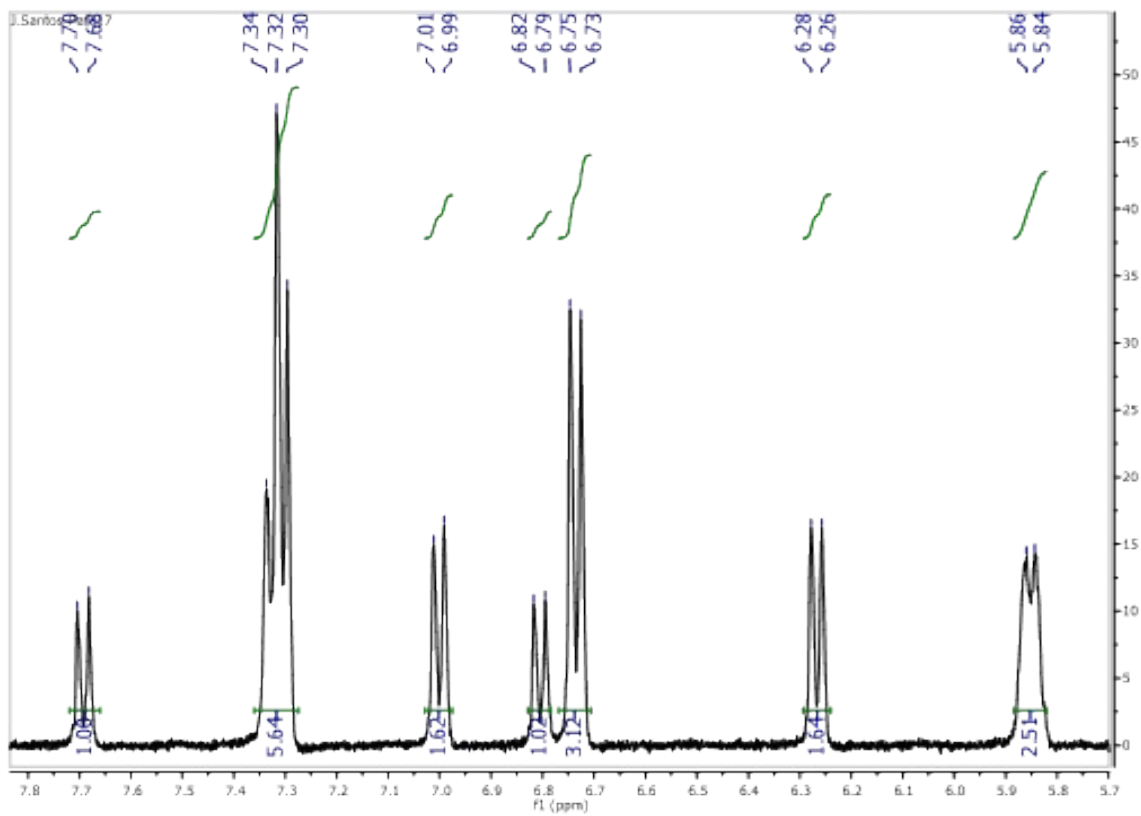

Figure S18.- <sup>1</sup>H-NMR spectrum for the reaction of **7** with excess of morpholine in dimethylsulfoxide.

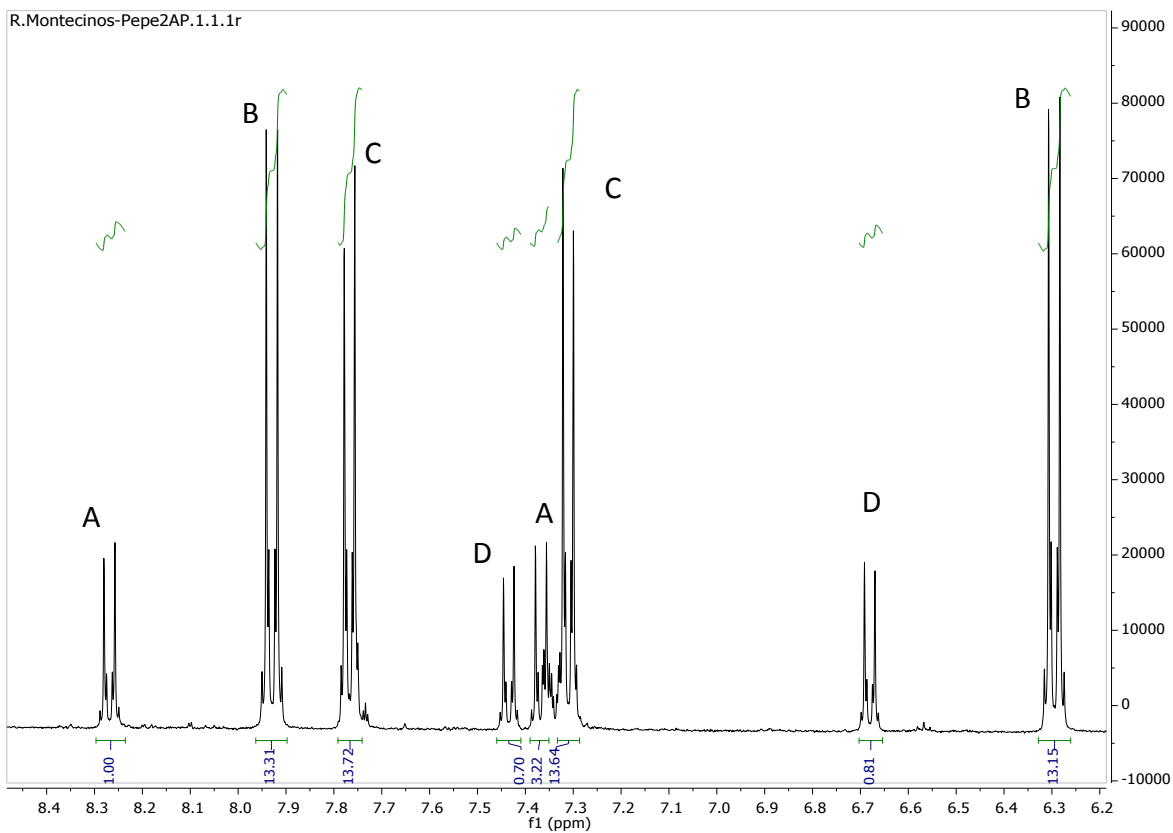

**Figure S19.-**  $^1\text{H-NMR}$  spectrum for the reaction of **9** with excess of piperidine in acetonitrile- $\text{d}_3$ .  
 A: Piperidine 4-nitrophenyl carbamate, B: 4-nitrophenol, C: Piperidine 4-cyanophenyl carbamate, D: 4-cyanophenol
